# Supplementary material
Source: PubMed Central journal article supplement (PMC6246788)

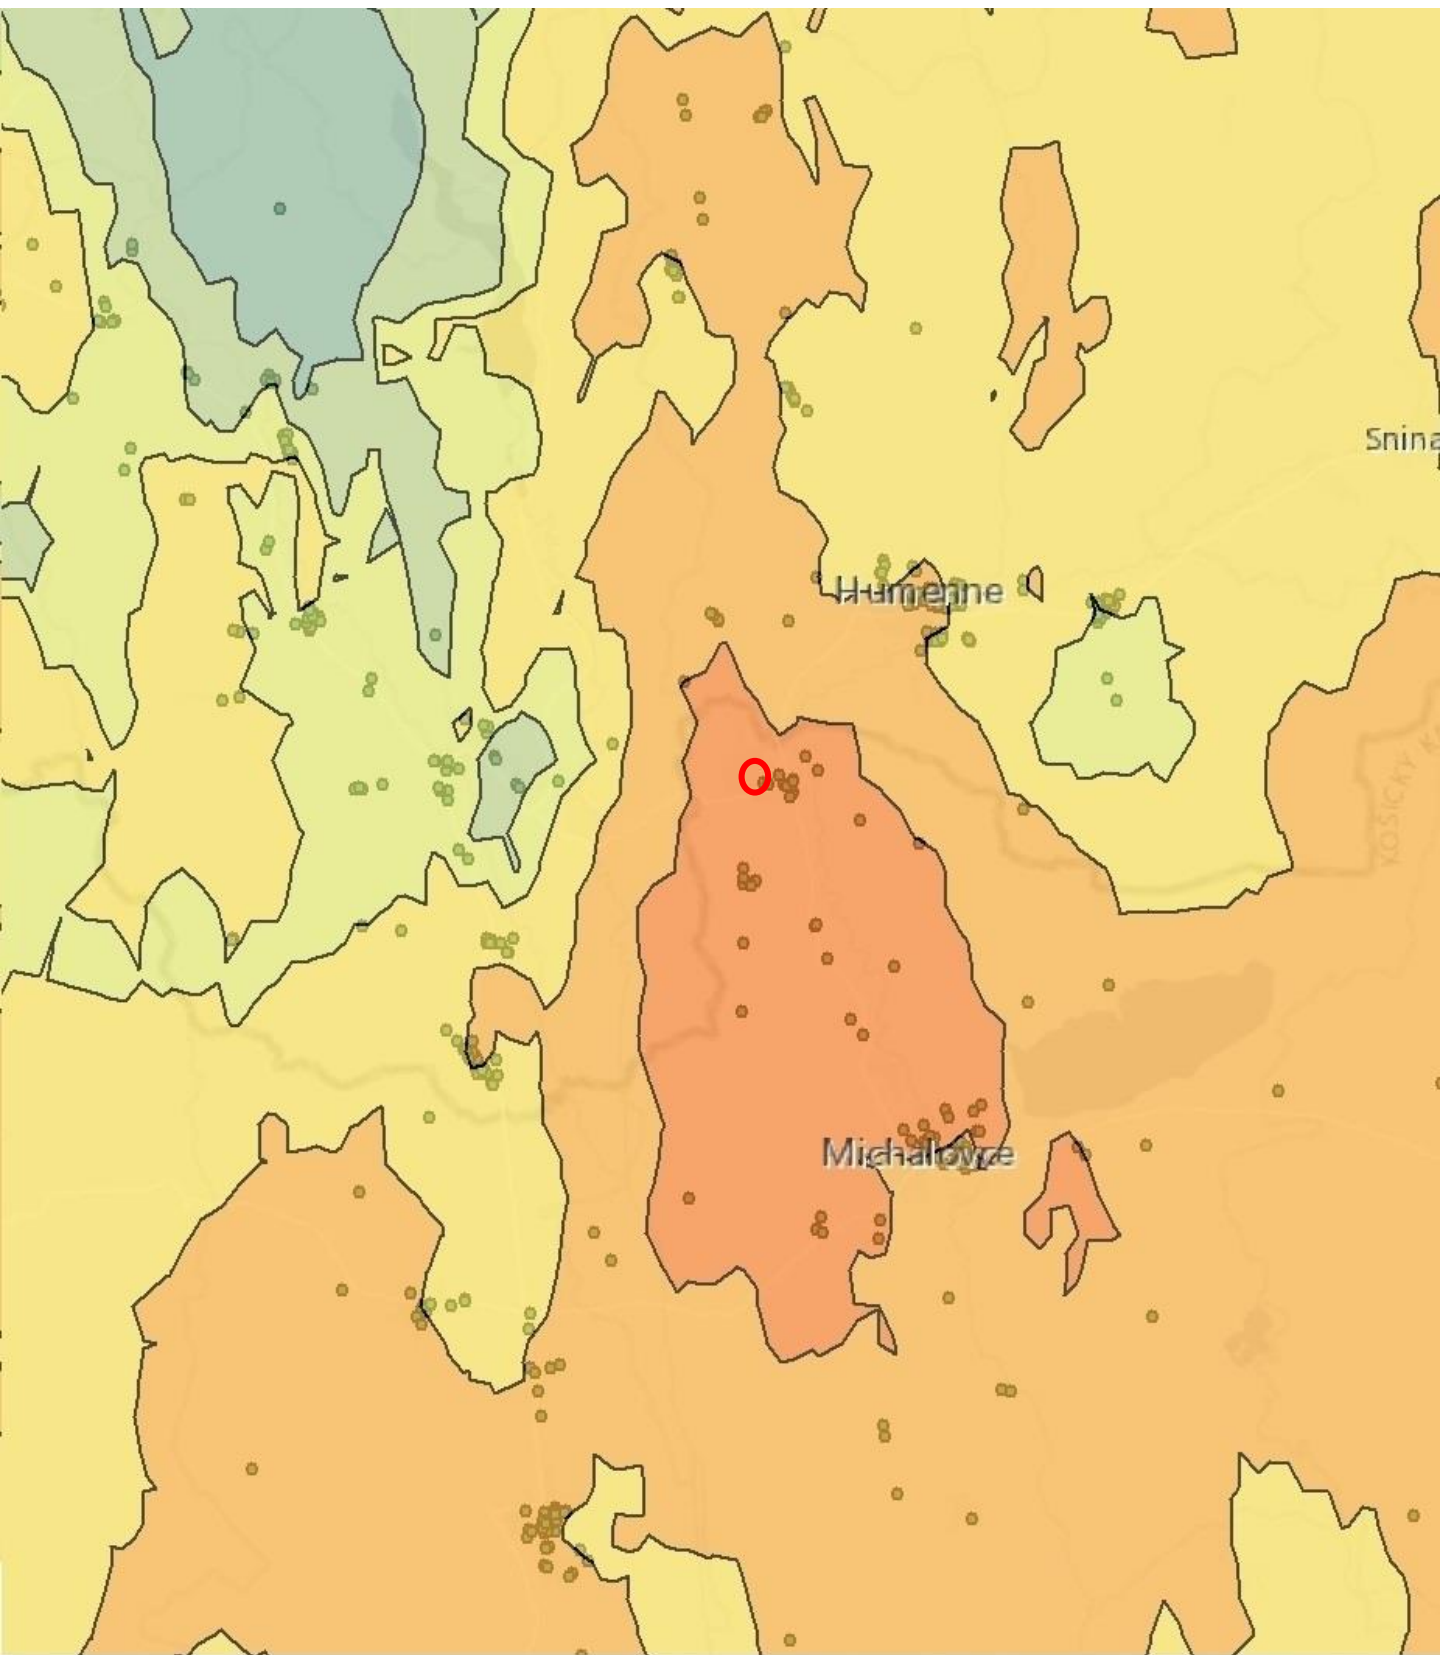

Esri, HERE, DeLorme, MapmyIndia, © OpenStreetMap contributors, and the GIS user community

**PCB 28**

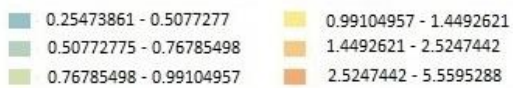

**APPROXIMATE AREA**

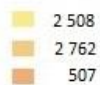

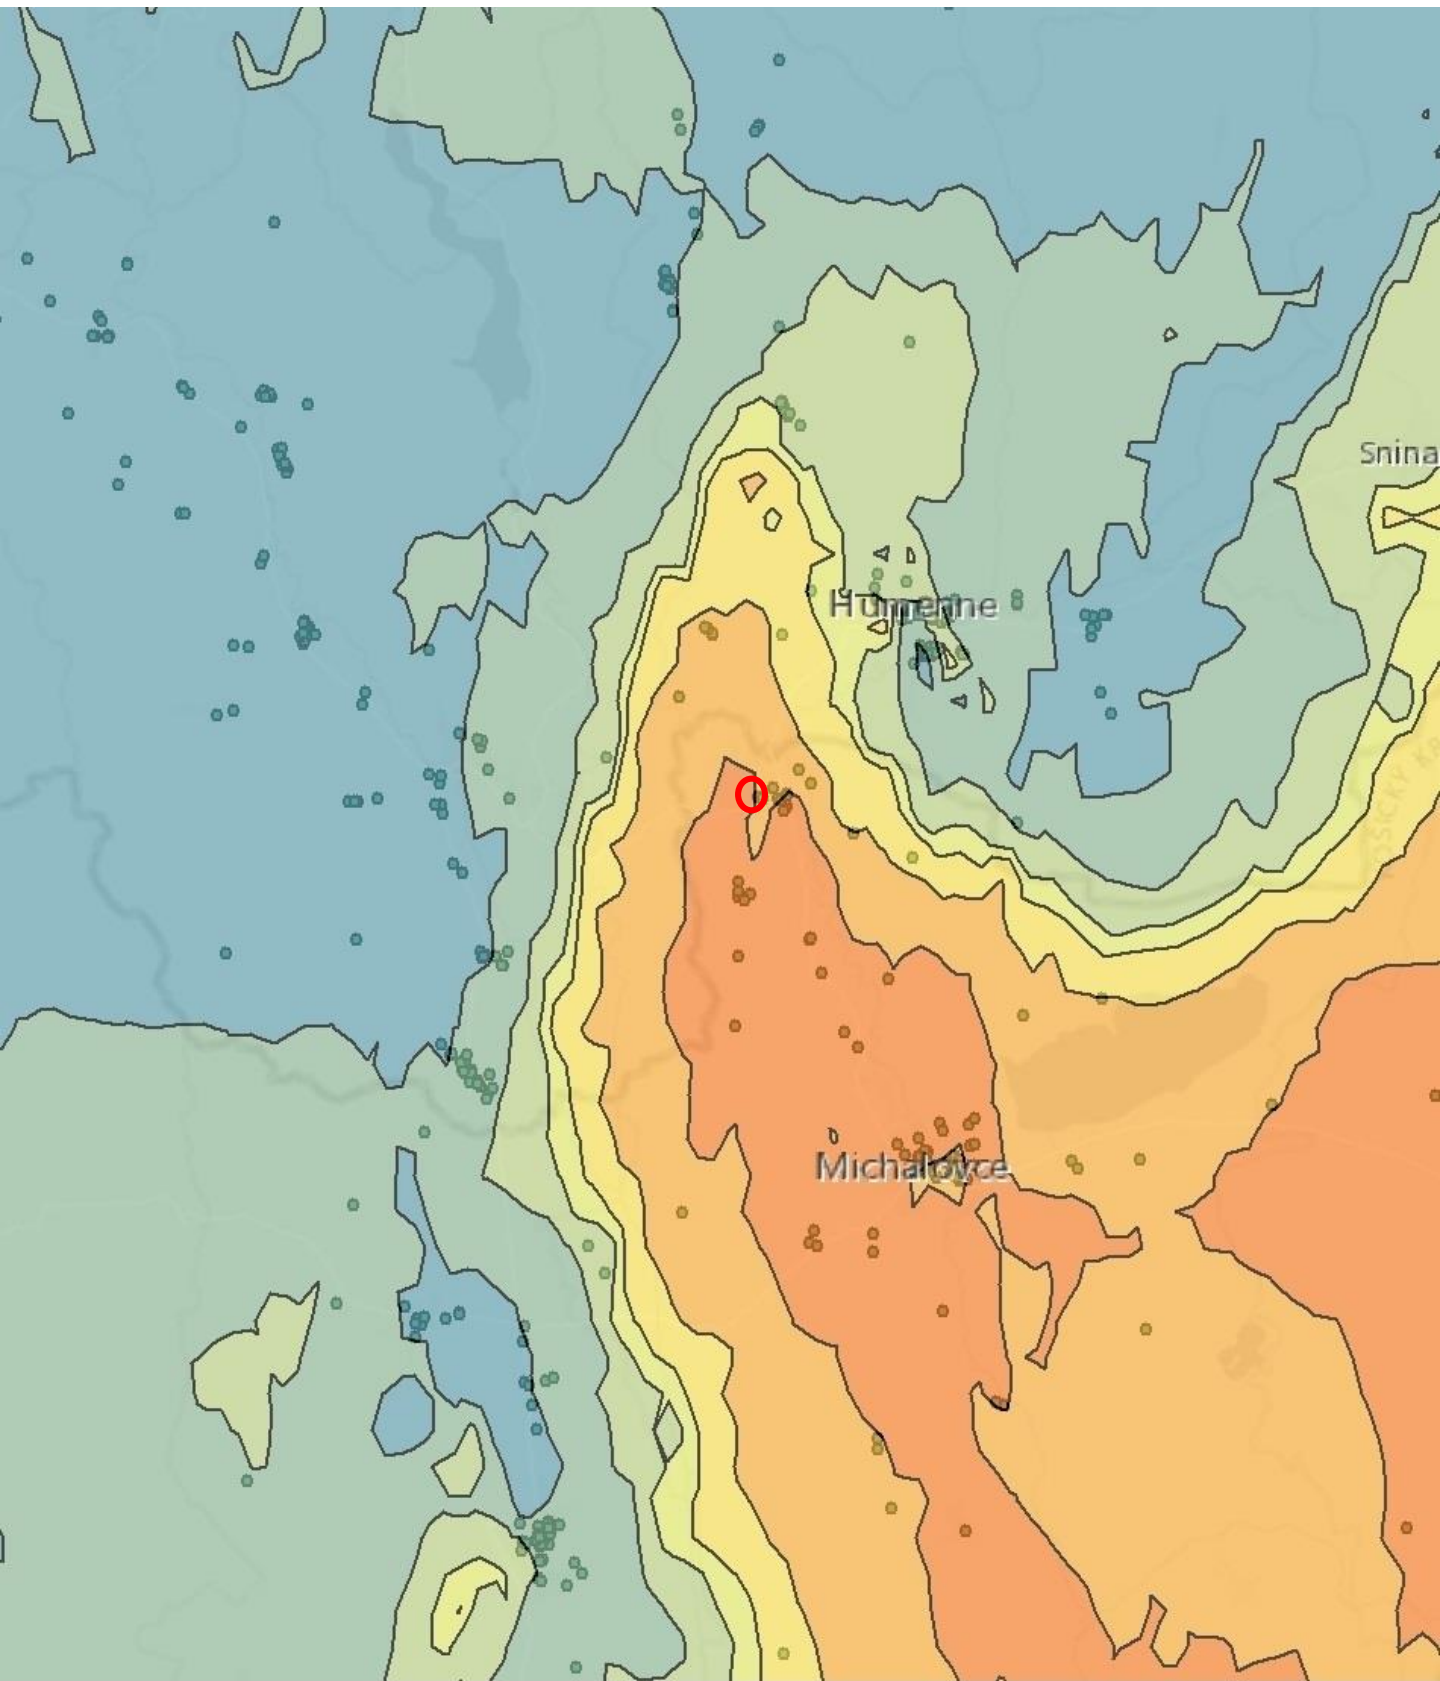

Esri, HERE, DeLorme, MapmyIndia, © OpenStreetMap contributors, and the GIS user community

**PCB 52**

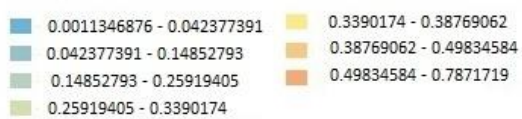

**APPROXIMATE AREA**

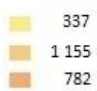

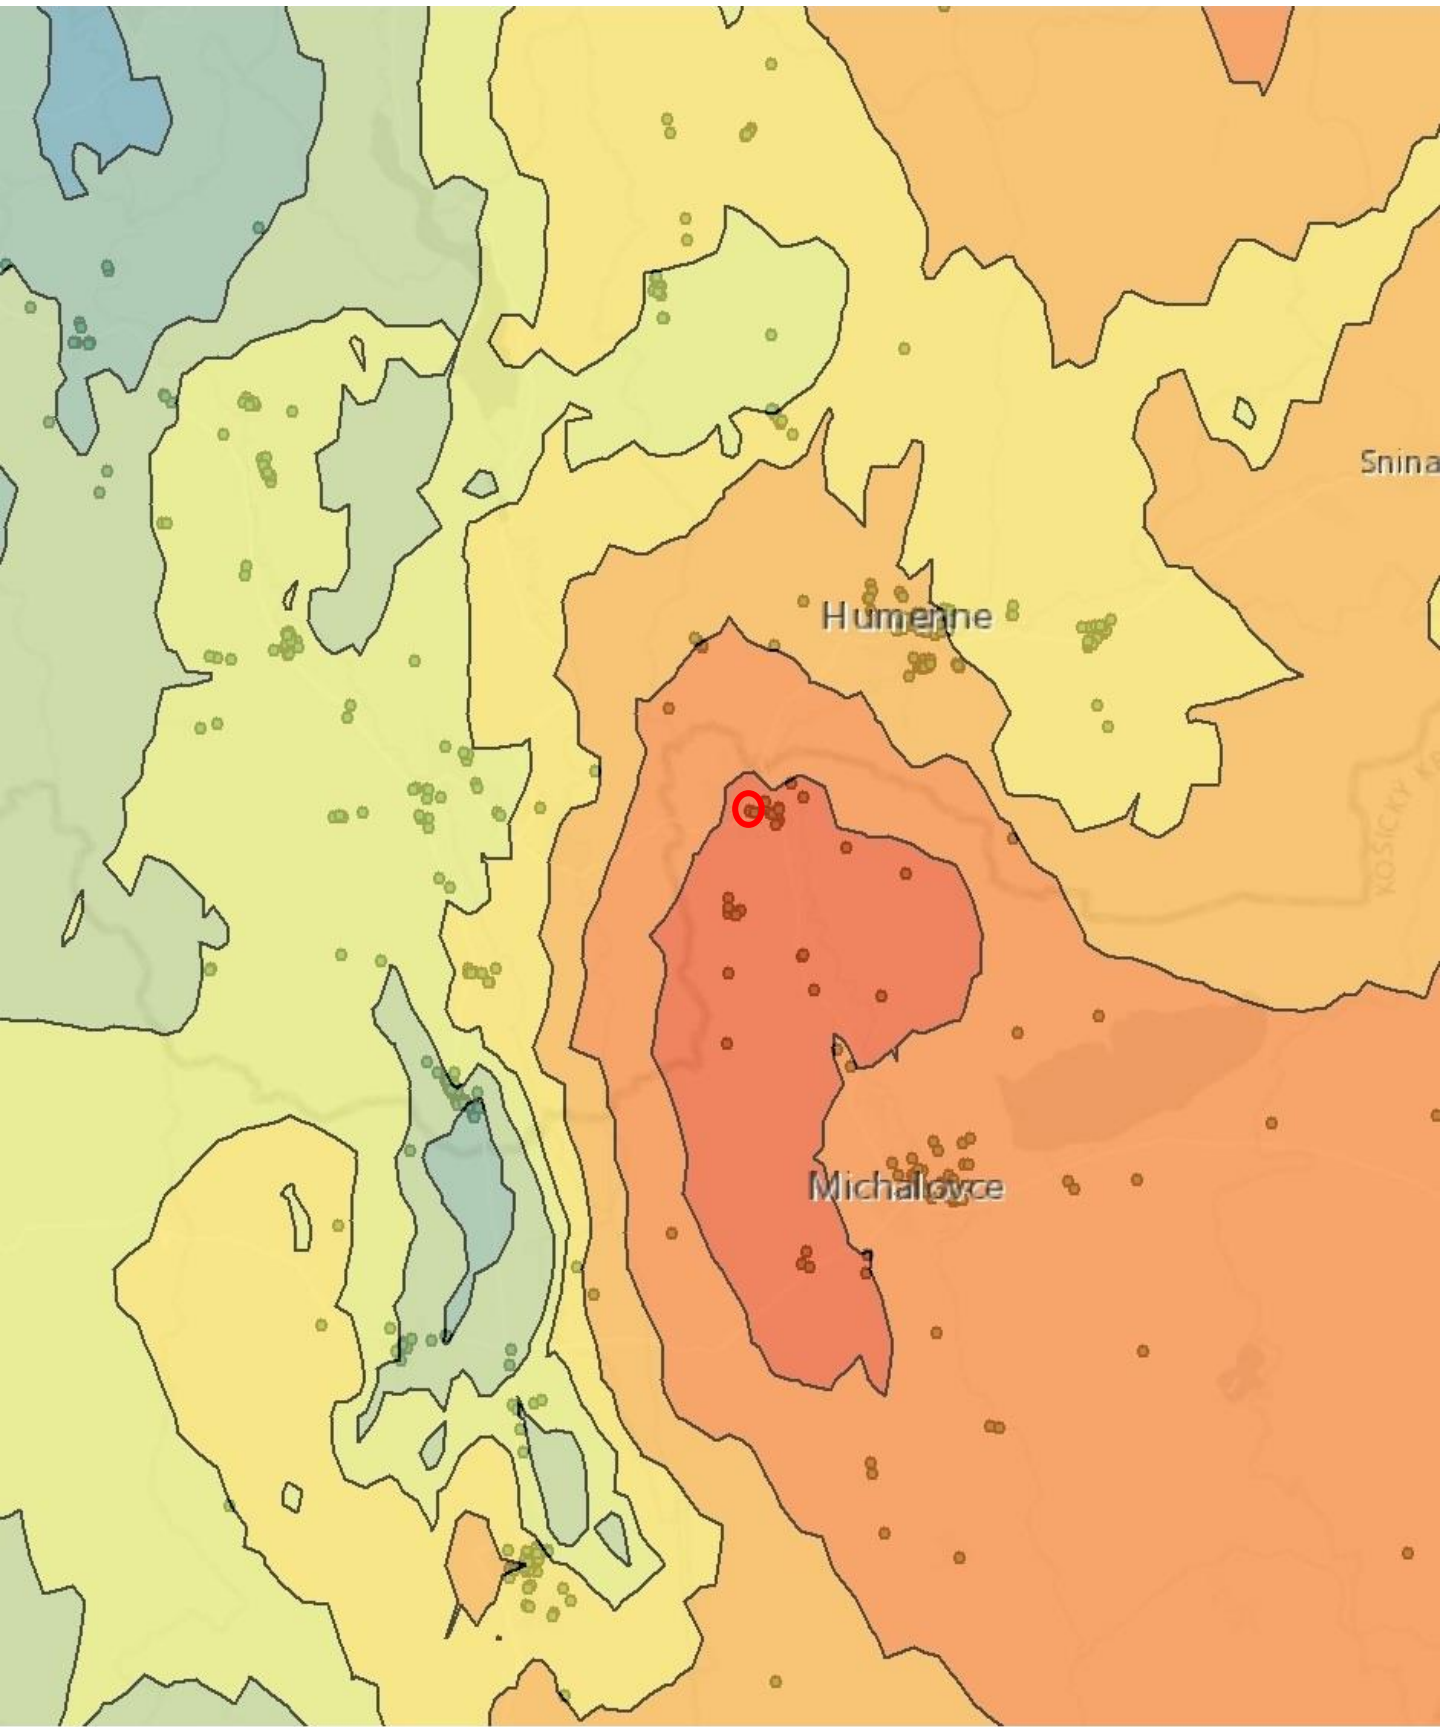

Esri, HERE, DeLorme, MapmyIndia, © OpenStreetMap contributors, and the GIS user community

**PCB 74**

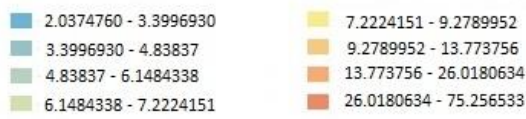

**APPROXIMATE AREA**

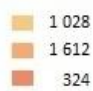

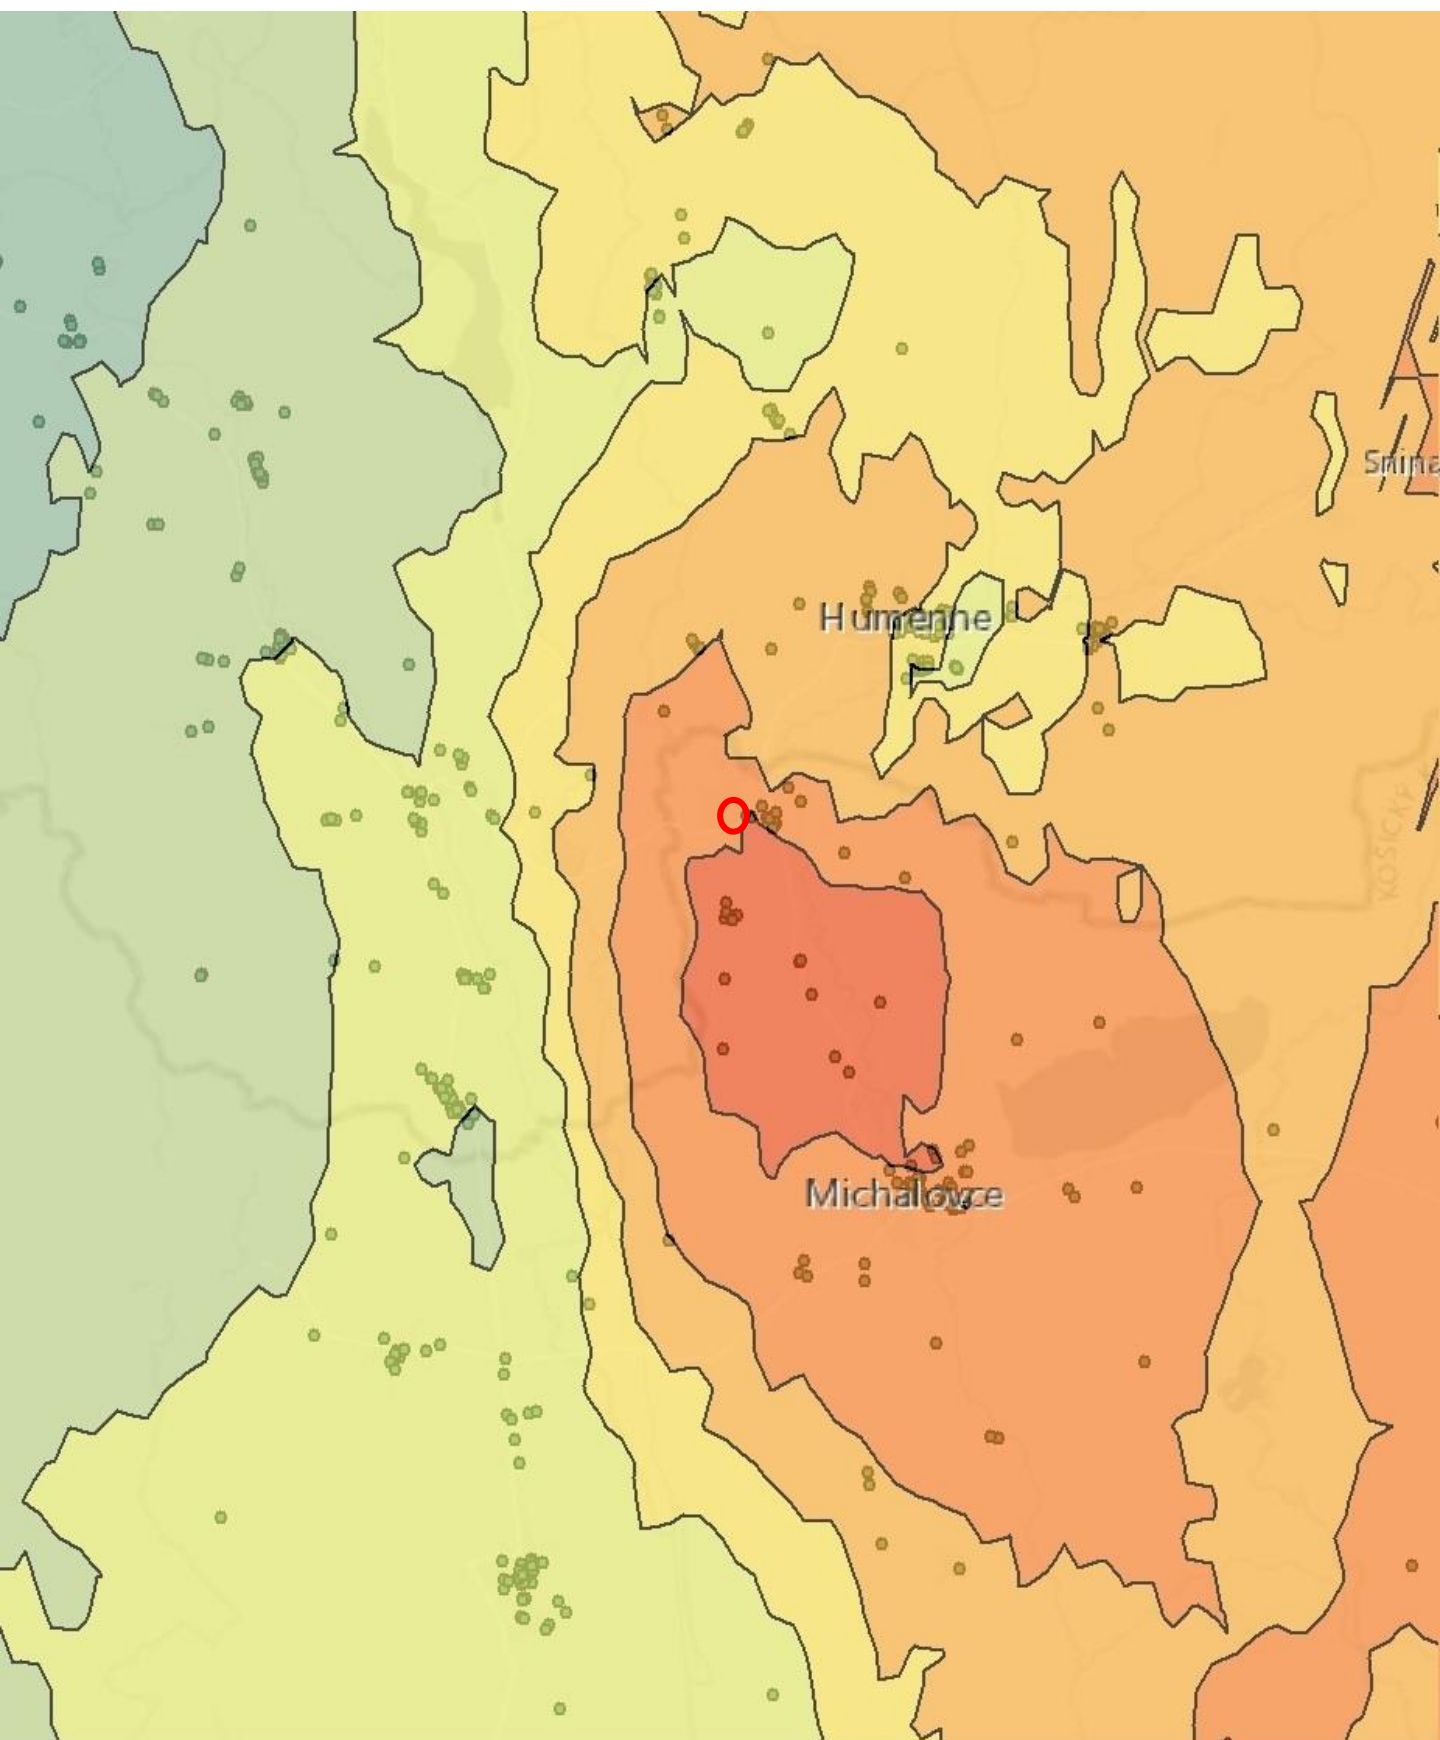

Esri, HERE, DeLorme, MapmyIndia, © OpenStreetMap contributors, and the GIS user community

**PCB 99**

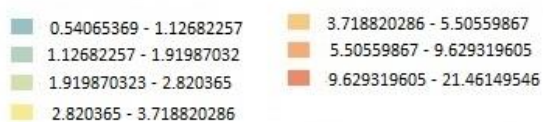

**APPROXIMATE AREA**

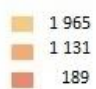

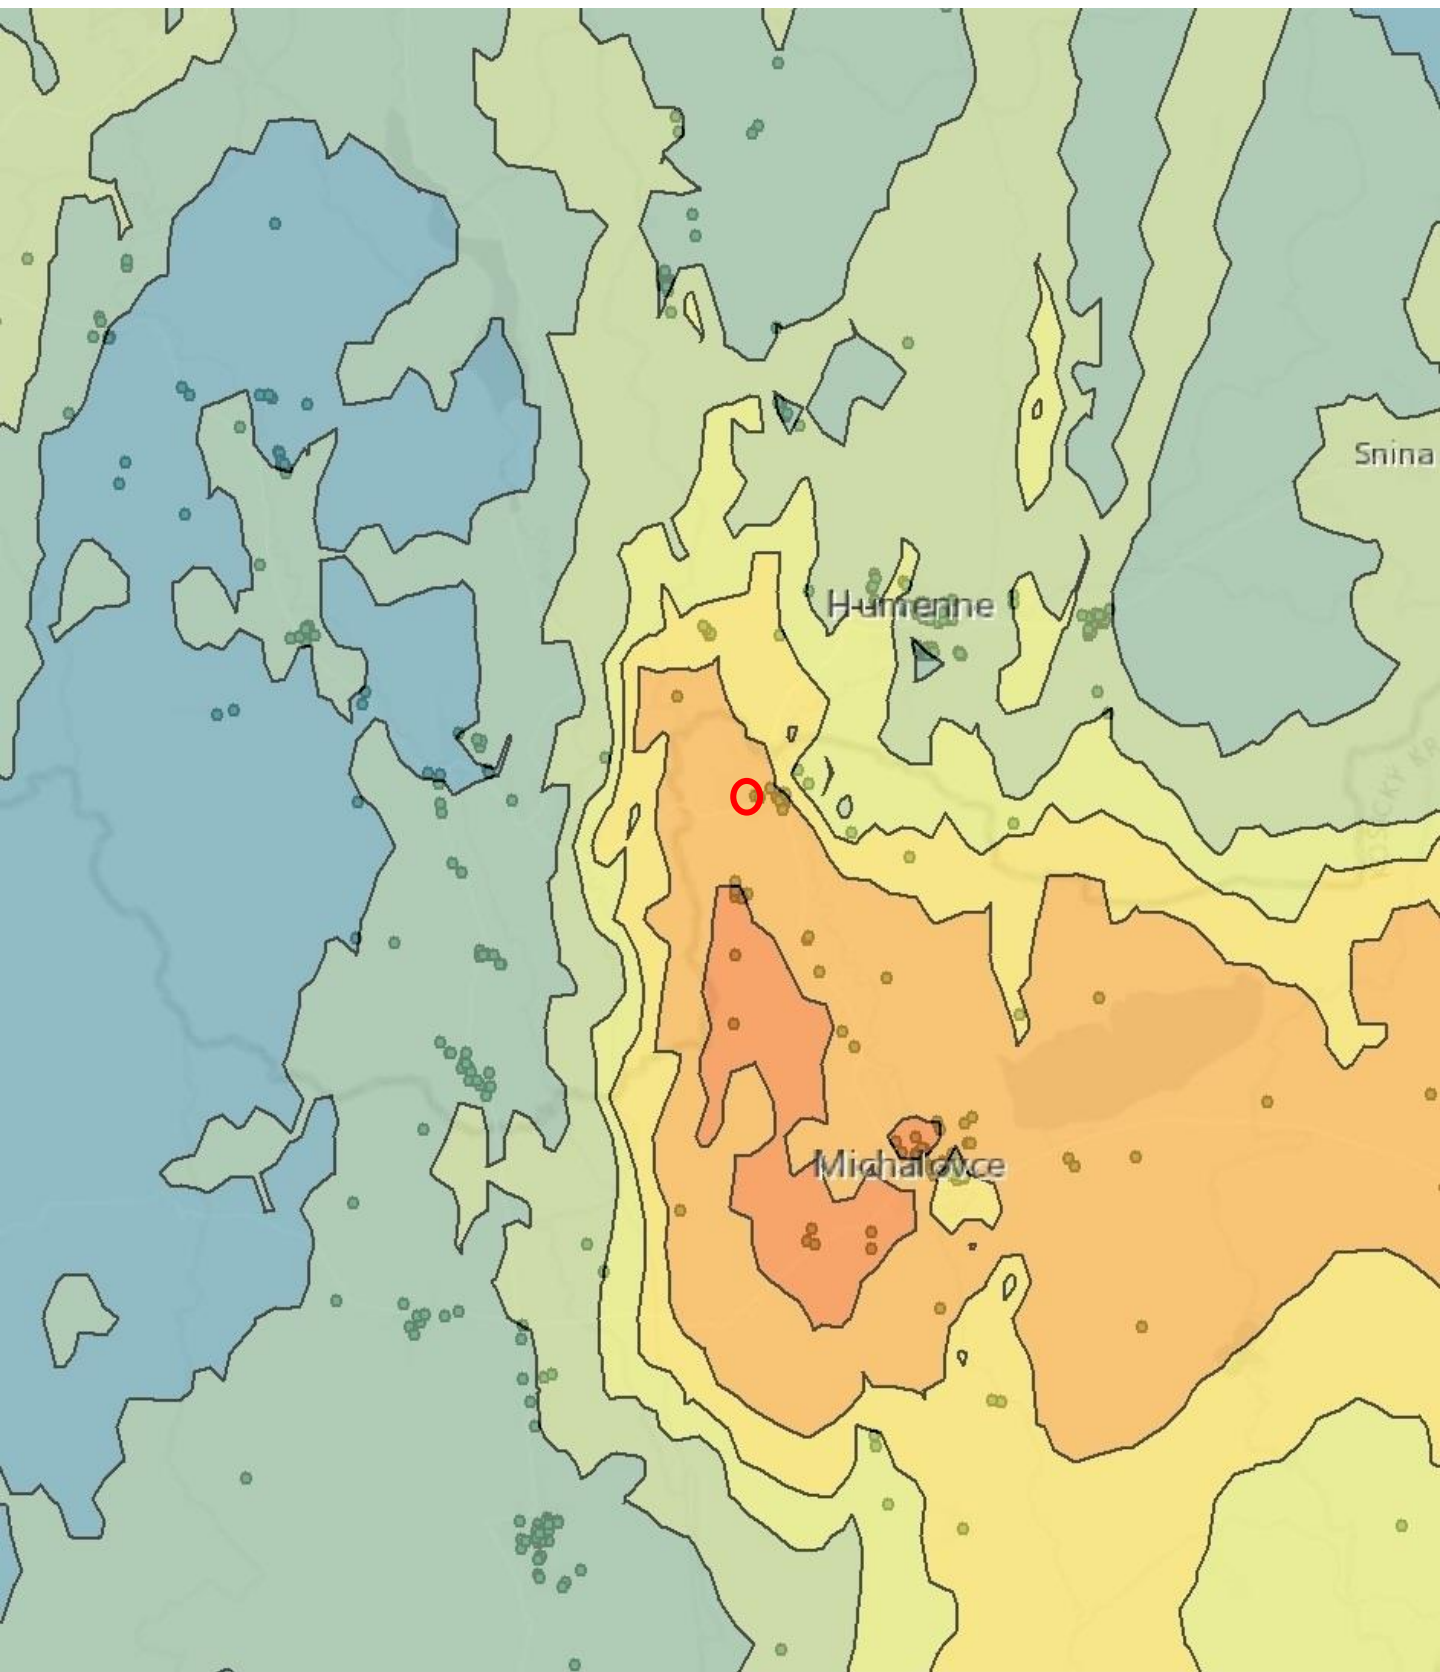

Esri, HERE, DeLorme, MapmyIndia, © OpenStreetMap contributors, and the GIS user community

**PCB 101**

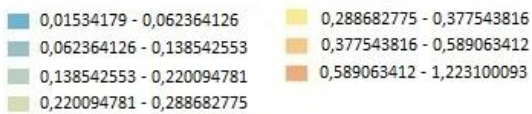

**APPROXIMATE AREA**

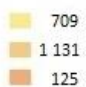

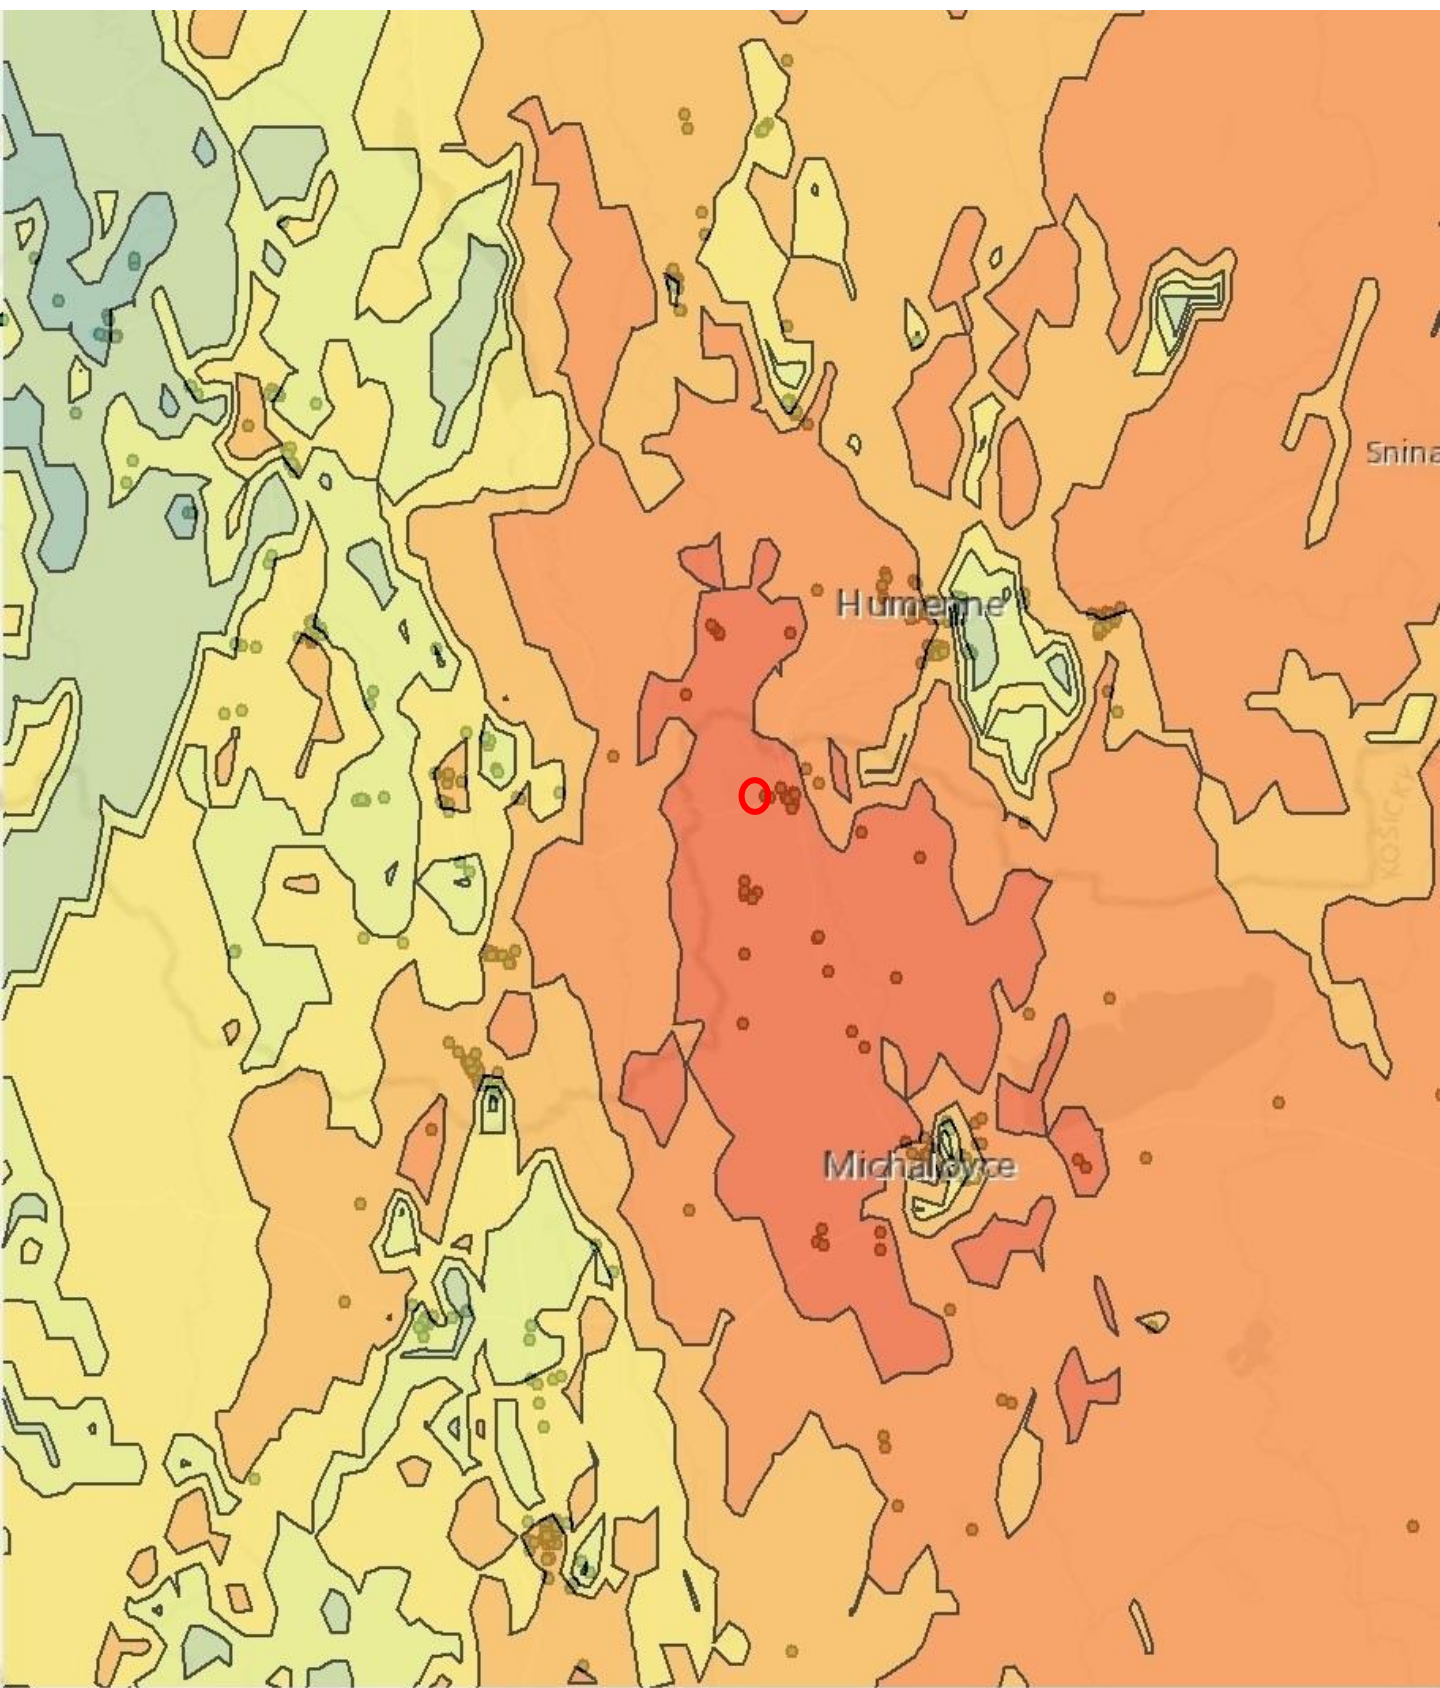

Esri, HERE, DeLorme, MapmyIndia, © OpenStreetMap contributors, and the GIS user community

**PCB 105**

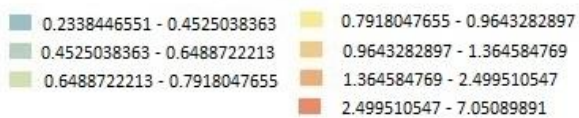

**APPROXIMATE AREA**

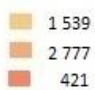

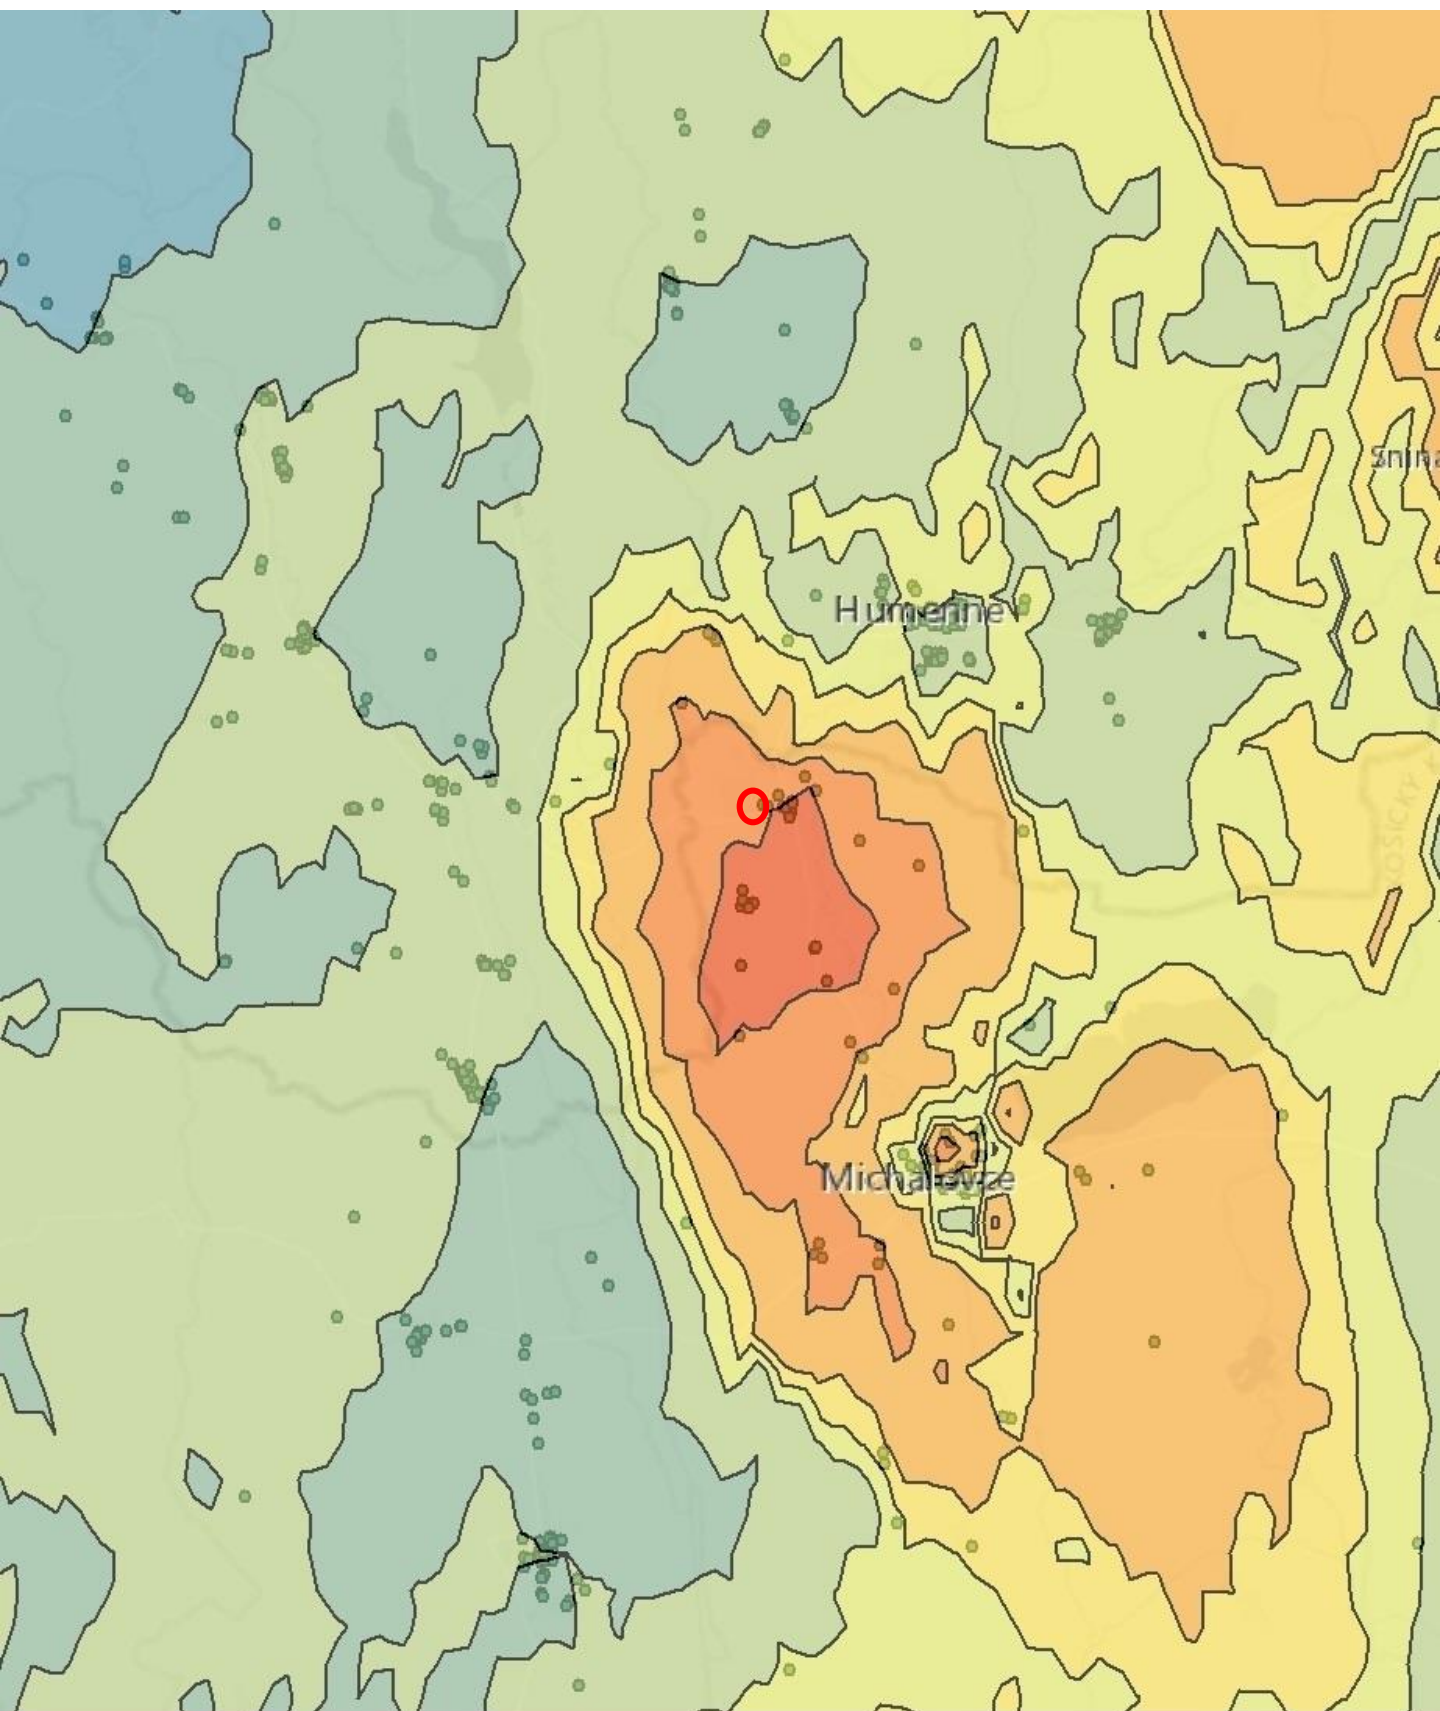

Esri, HERE, DeLorme, MapmyIndia, © OpenStreetMap contributors, and the GIS user community

**PCB 114**

|                                                                                                                                                                                                                                                                                                                                                                                                                                                                                                                                                                                                                                                                                                                                                                                          |                                                                                                                                                                                                                                                                                                                                                                                                                                                                                                                                                                                                                                                                                                                                                                                       |
|------------------------------------------------------------------------------------------------------------------------------------------------------------------------------------------------------------------------------------------------------------------------------------------------------------------------------------------------------------------------------------------------------------------------------------------------------------------------------------------------------------------------------------------------------------------------------------------------------------------------------------------------------------------------------------------------------------------------------------------------------------------------------------------|---------------------------------------------------------------------------------------------------------------------------------------------------------------------------------------------------------------------------------------------------------------------------------------------------------------------------------------------------------------------------------------------------------------------------------------------------------------------------------------------------------------------------------------------------------------------------------------------------------------------------------------------------------------------------------------------------------------------------------------------------------------------------------------|
| <ul style="list-style-type: none"> <li><span style="display: inline-block; width: 15px; height: 10px; background-color: #4682B4; border: 1px solid black; margin-right: 5px;"></span> 0.0281017305 - 0.1283709578</li> <li><span style="display: inline-block; width: 15px; height: 10px; background-color: #87CEEB; border: 1px solid black; margin-right: 5px;"></span> 0.1283709578 - 0.2548114268</li> <li><span style="display: inline-block; width: 15px; height: 10px; background-color: #A9D0D9; border: 1px solid black; margin-right: 5px;"></span> 0.2548114268 - 0.3591719044</li> <li><span style="display: inline-block; width: 15px; height: 10px; background-color: #C8E6C9; border: 1px solid black; margin-right: 5px;"></span> 0.3591719044 - 0.4299284946</li> </ul> | <ul style="list-style-type: none"> <li><span style="display: inline-block; width: 15px; height: 10px; background-color: #FFF9C4; border: 1px solid black; margin-right: 5px;"></span> 0.4299284946 - 0.5117306985</li> <li><span style="display: inline-block; width: 15px; height: 10px; background-color: #FFCC80; border: 1px solid black; margin-right: 5px;"></span> 0.5117306985 - 0.6934447536</li> <li><span style="display: inline-block; width: 15px; height: 10px; background-color: #FF9800; border: 1px solid black; margin-right: 5px;"></span> 0.6934447536 - 1.159517047</li> <li><span style="display: inline-block; width: 15px; height: 10px; background-color: #E57373; border: 1px solid black; margin-right: 5px;"></span> 1.159517047 - 2.657212358</li> </ul> |
|------------------------------------------------------------------------------------------------------------------------------------------------------------------------------------------------------------------------------------------------------------------------------------------------------------------------------------------------------------------------------------------------------------------------------------------------------------------------------------------------------------------------------------------------------------------------------------------------------------------------------------------------------------------------------------------------------------------------------------------------------------------------------------------|---------------------------------------------------------------------------------------------------------------------------------------------------------------------------------------------------------------------------------------------------------------------------------------------------------------------------------------------------------------------------------------------------------------------------------------------------------------------------------------------------------------------------------------------------------------------------------------------------------------------------------------------------------------------------------------------------------------------------------------------------------------------------------------|

**APPROXIMATE AREA**

|                                                                                                                                                                                                                                                                                                                                                                                                                                                                                                                             |
|-----------------------------------------------------------------------------------------------------------------------------------------------------------------------------------------------------------------------------------------------------------------------------------------------------------------------------------------------------------------------------------------------------------------------------------------------------------------------------------------------------------------------------|
| <ul style="list-style-type: none"> <li><span style="display: inline-block; width: 15px; height: 10px; background-color: #FFCC80; border: 1px solid black; margin-right: 5px;"></span> 830</li> <li><span style="display: inline-block; width: 15px; height: 10px; background-color: #FF9800; border: 1px solid black; margin-right: 5px;"></span> 244</li> <li><span style="display: inline-block; width: 15px; height: 10px; background-color: #E57373; border: 1px solid black; margin-right: 5px;"></span> 81</li> </ul> |
|-----------------------------------------------------------------------------------------------------------------------------------------------------------------------------------------------------------------------------------------------------------------------------------------------------------------------------------------------------------------------------------------------------------------------------------------------------------------------------------------------------------------------------|

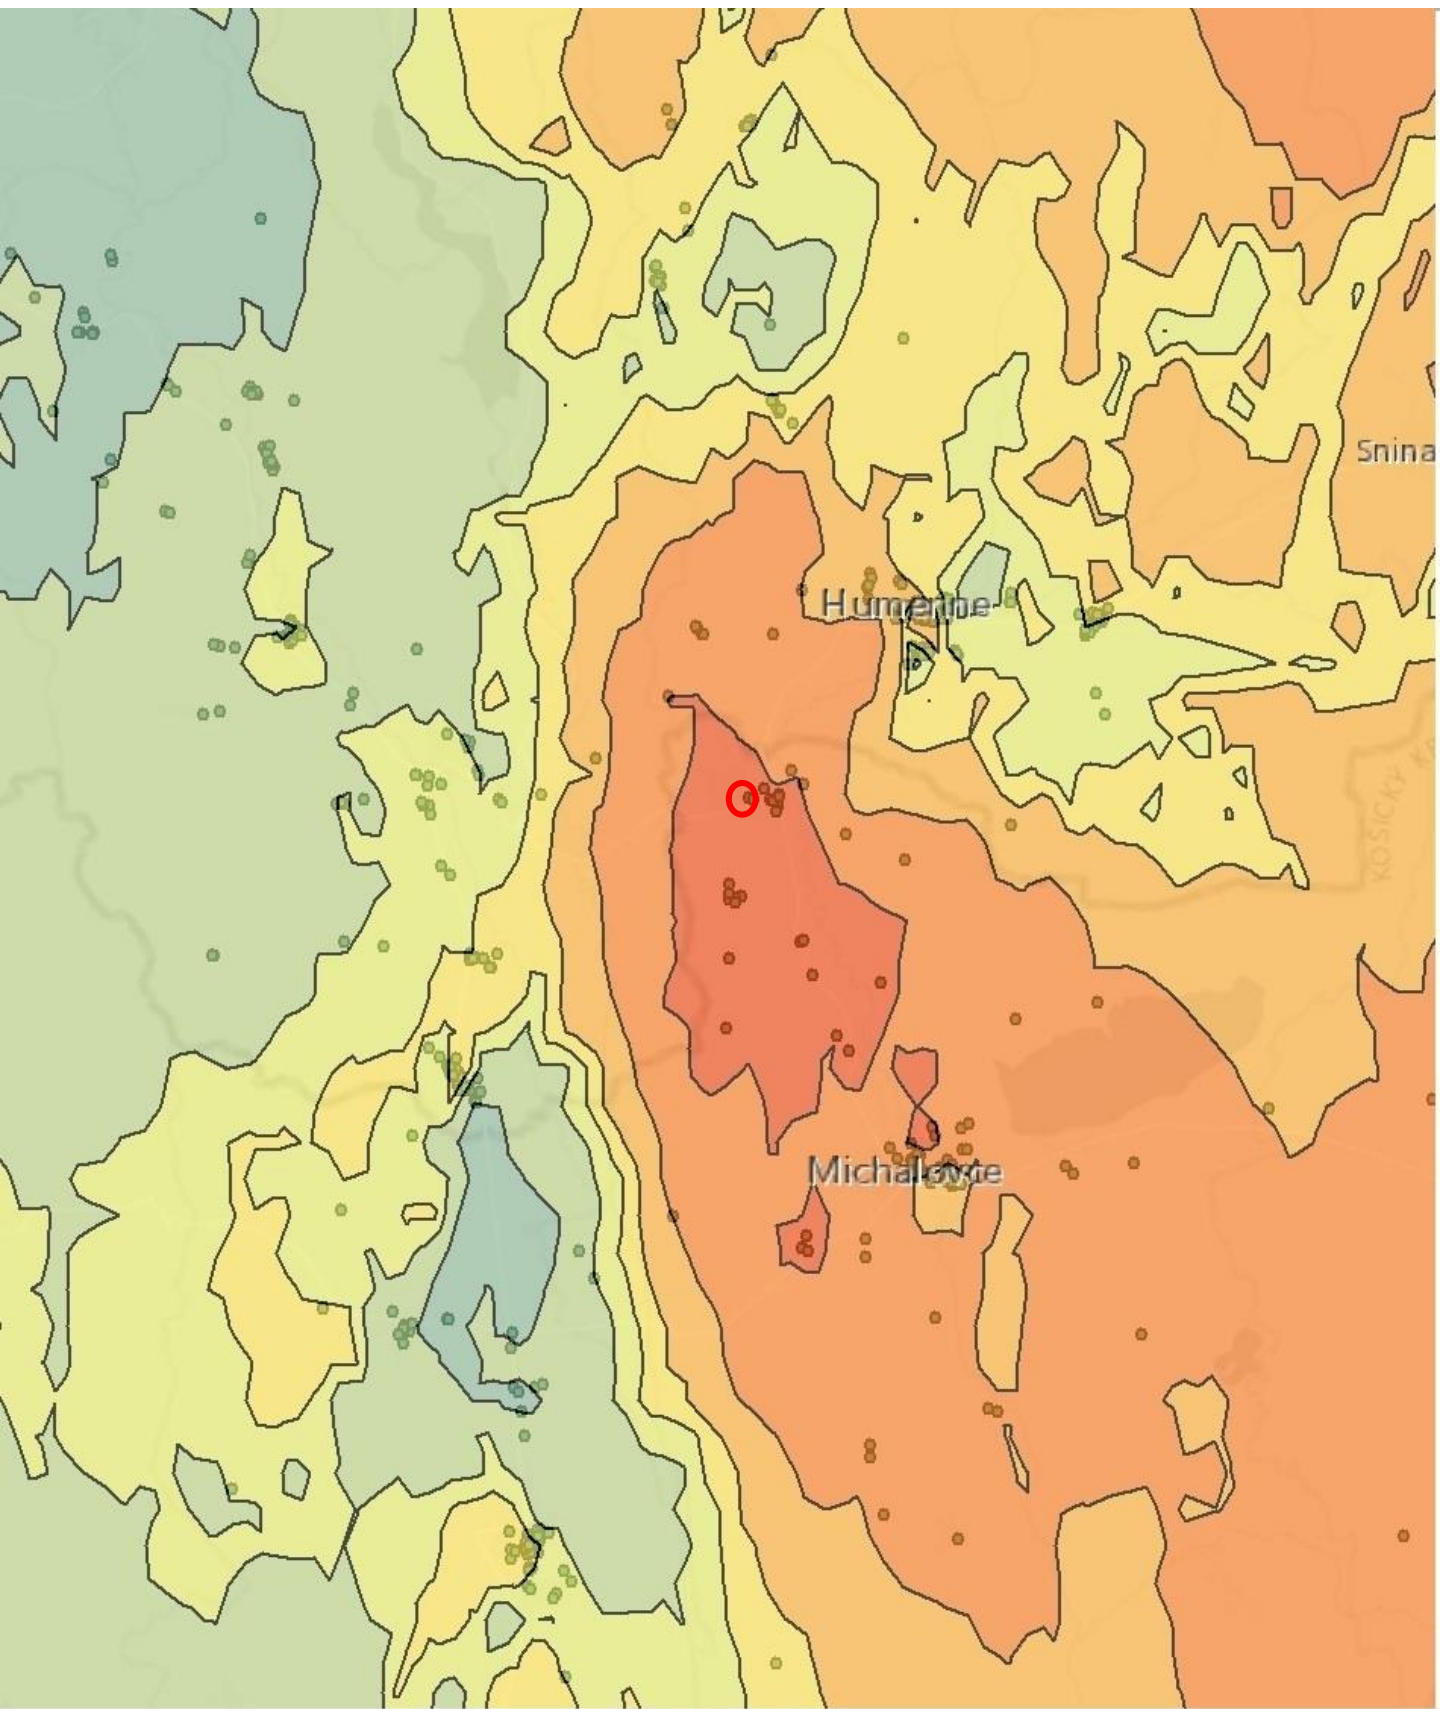

Esri, HERE, DeLorme, MapmyIndia, © OpenStreetMap contributors, and the GIS user community

**PCB 118**

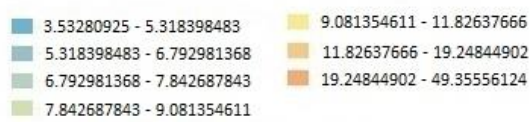

**APPROXIMATE AREA**

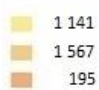



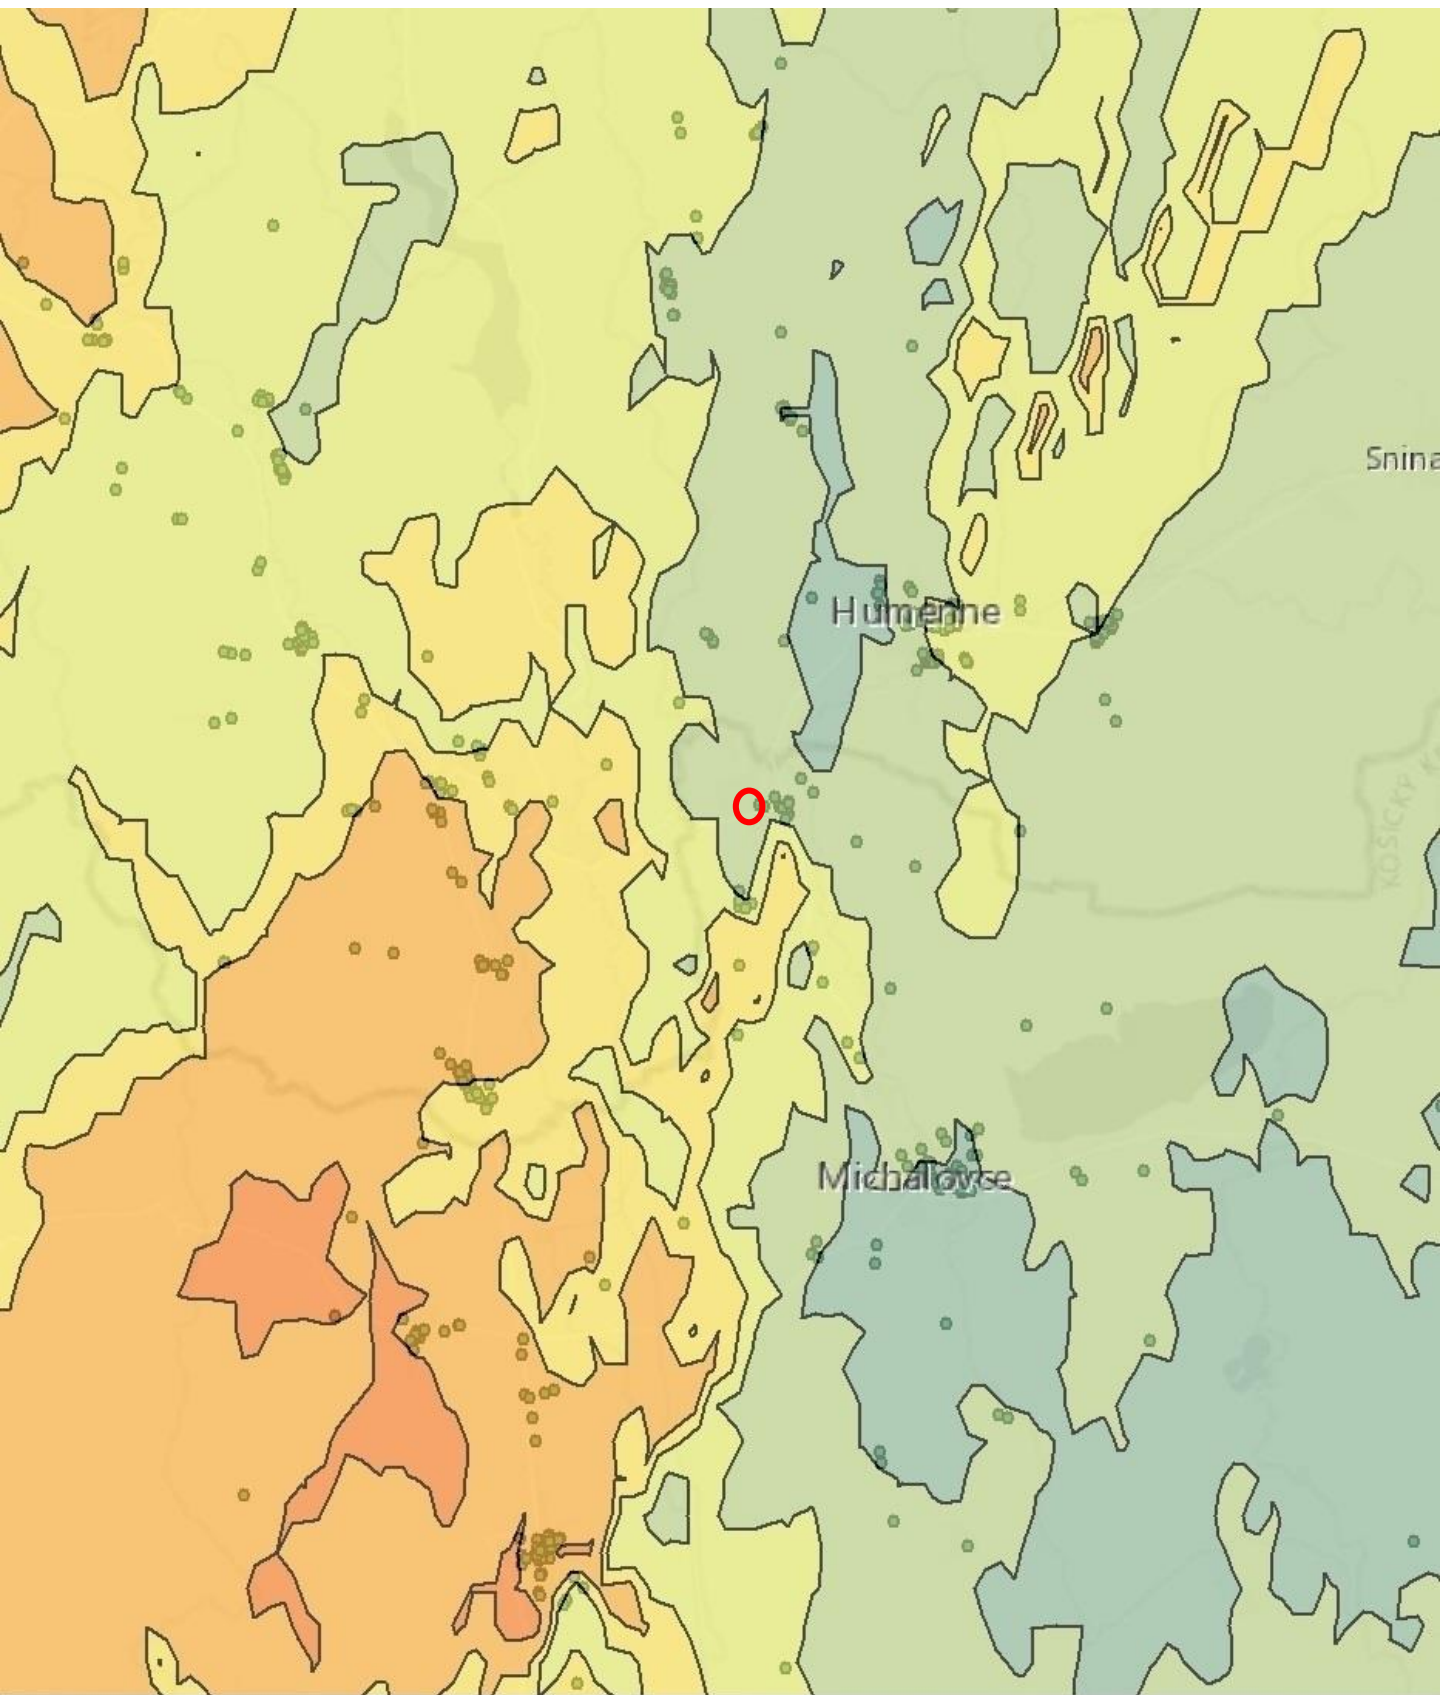

Esri, HERE, DeLorme, MapmyIndia, © OpenStreetMap contributors, and the GIS user community

**PCB 123**

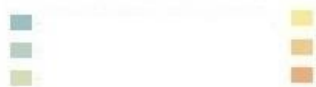

**APPROXIMATE AREA**

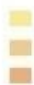

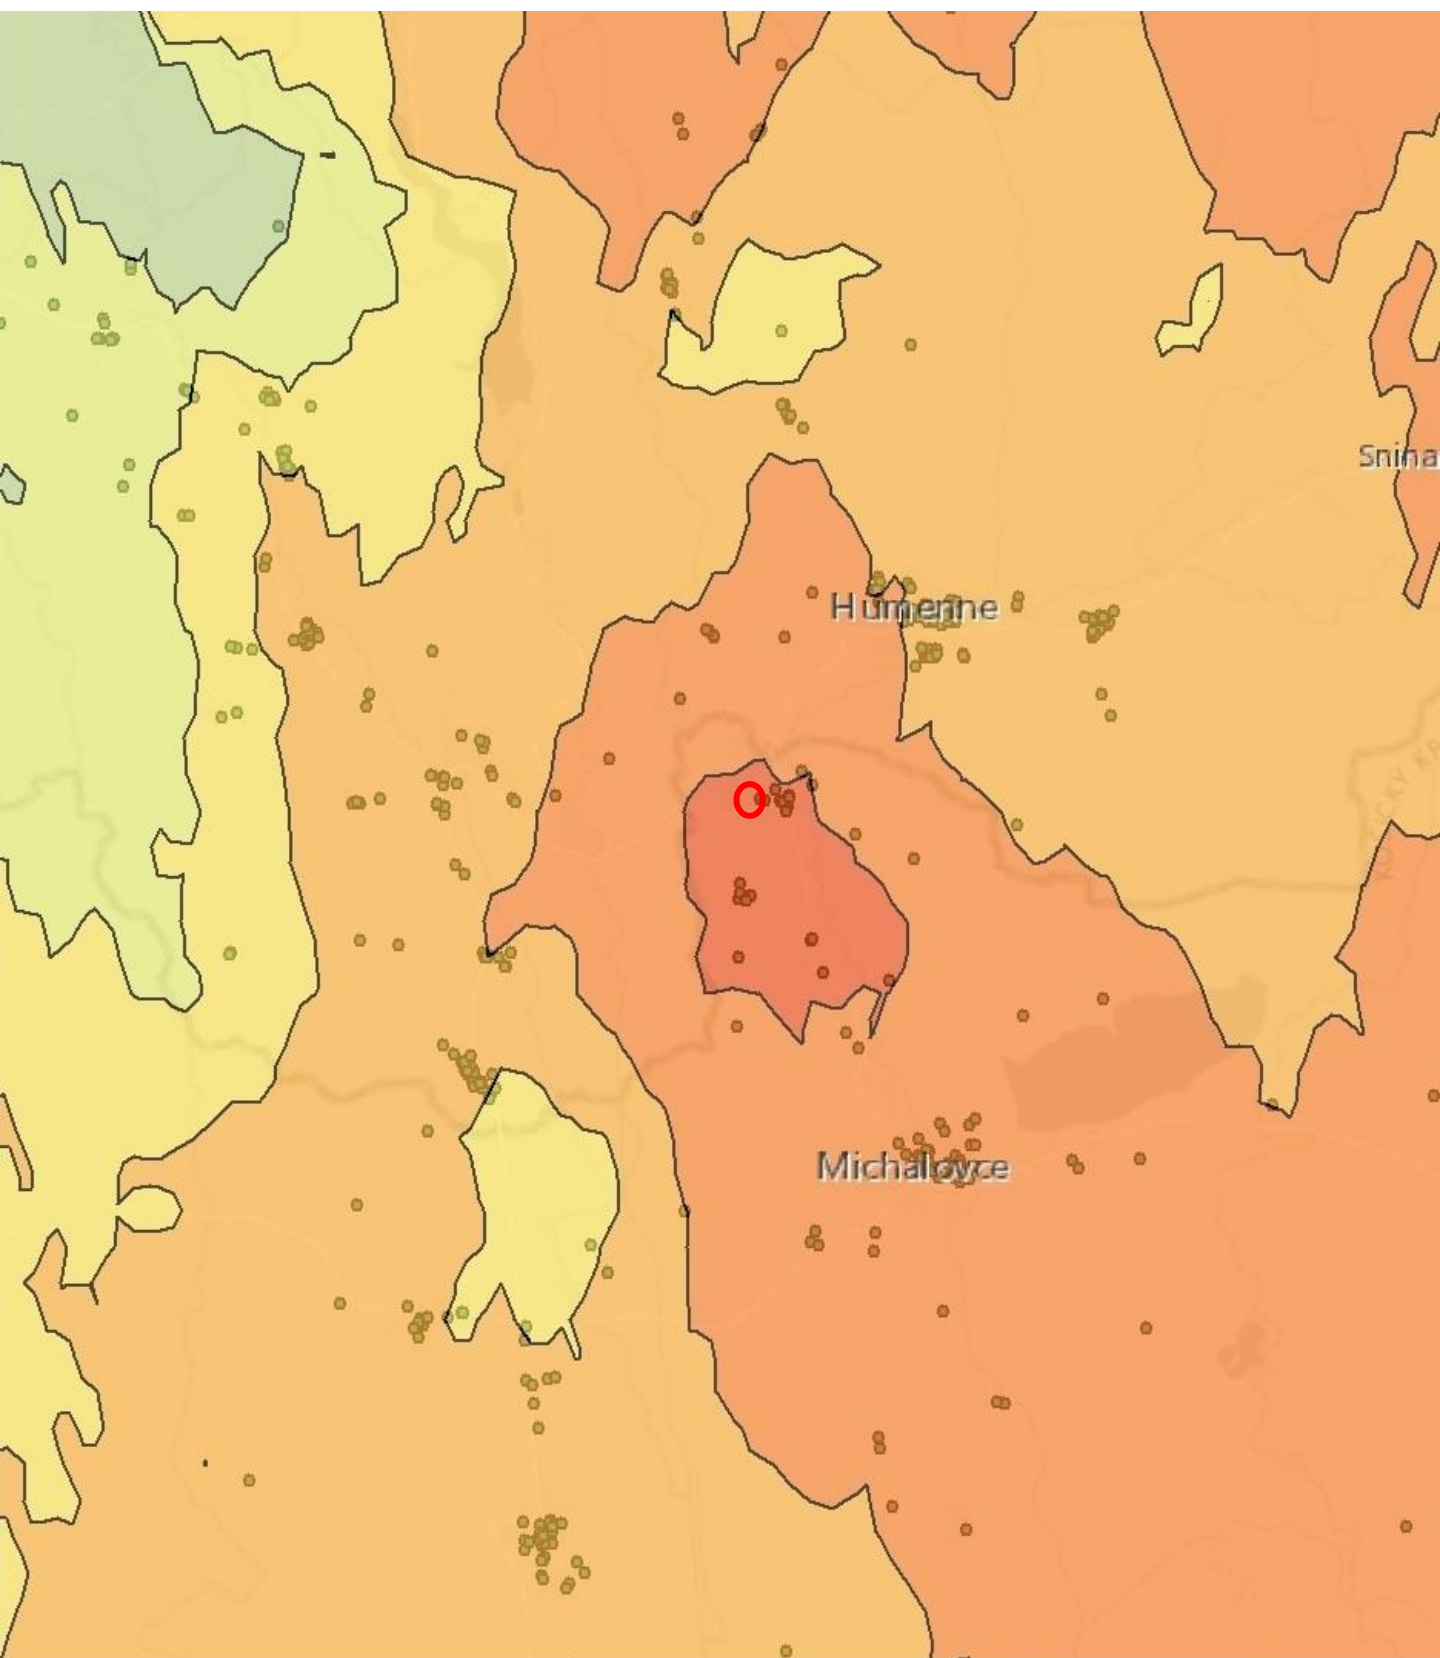

Esri, HERE, DeLorme, MapmyIndia, © OpenStreetMap contributors, and the GIS user community

**PCB 138**

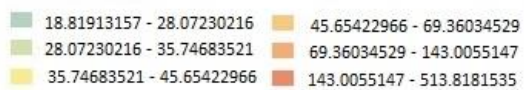

**APPROXIMATE AREA**

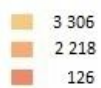

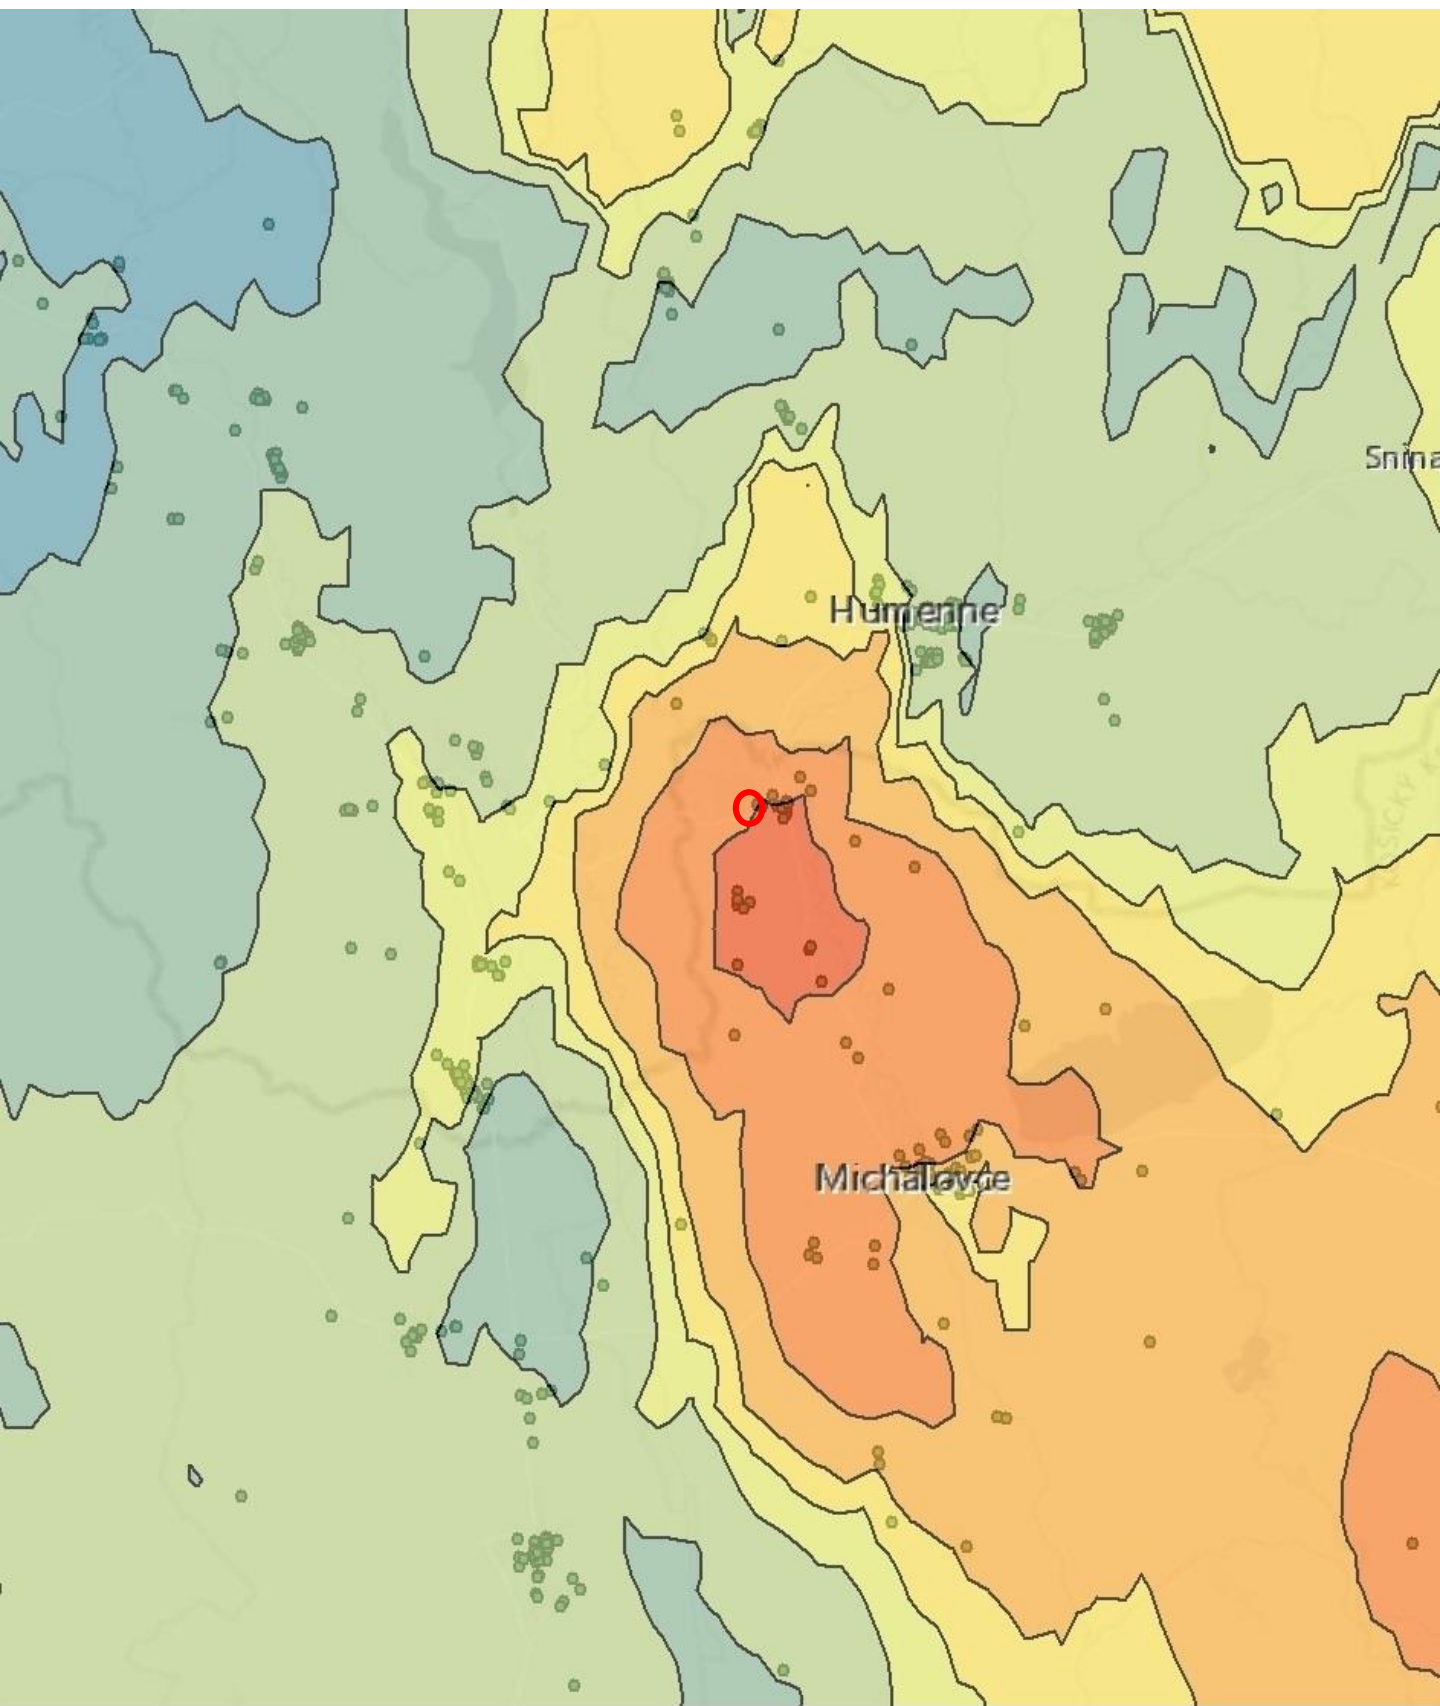

Esri, HERE, DeLorme, MapmyIndia, © OpenStreetMap contributors, and the GIS user community

**PCB 153**

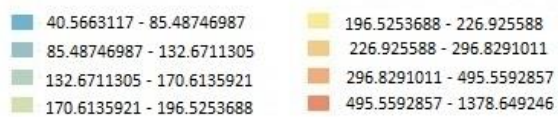

**APPROXIMATE AREA**

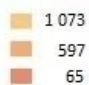

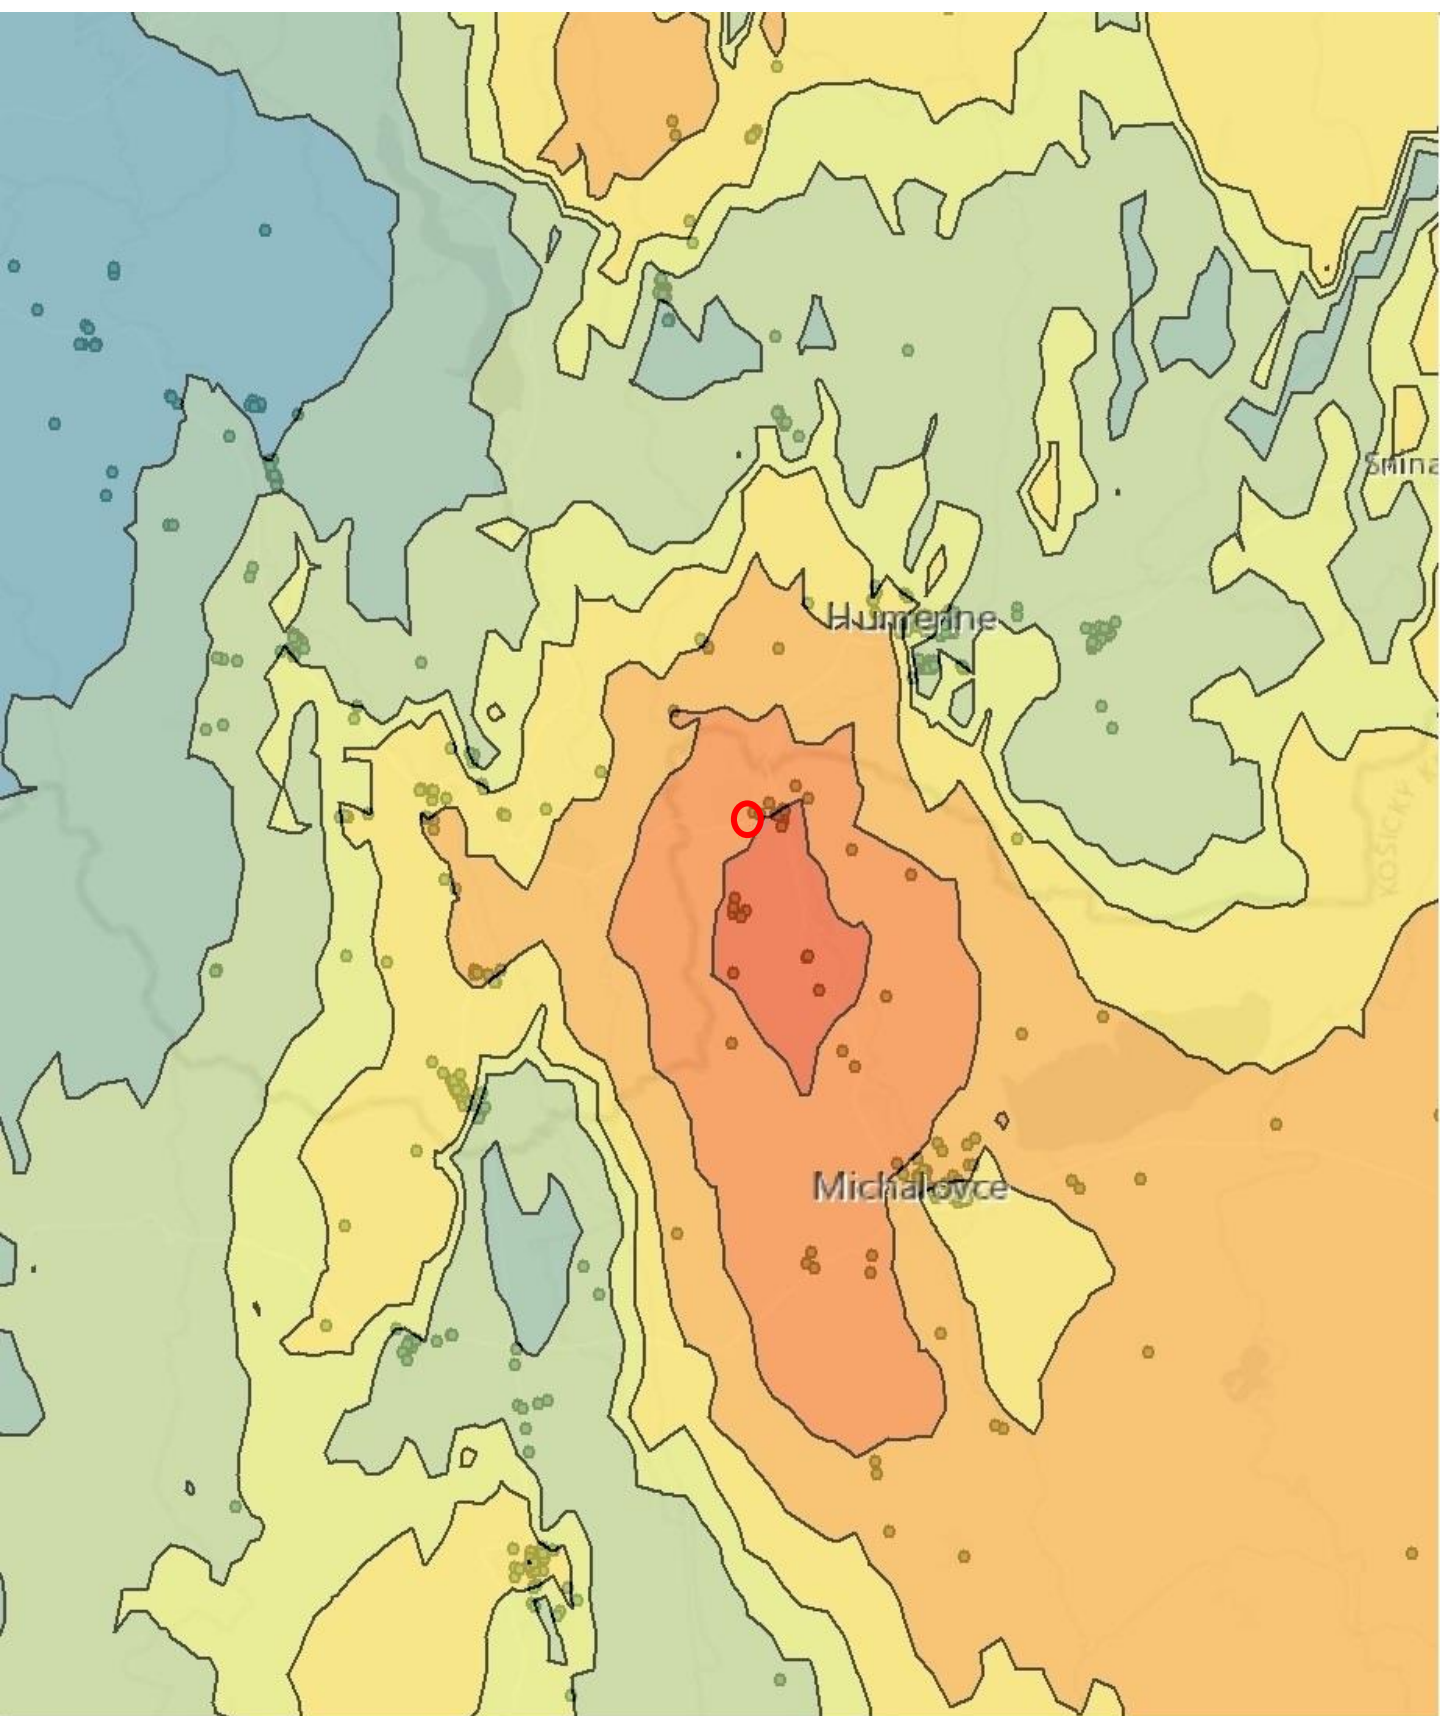

Esri, HERE, DeLorme, MapmyIndia, © OpenStreetMap contributors, and the GIS user community

### PCB 156

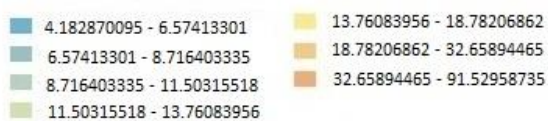

### APPROXIMATE AREA

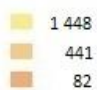

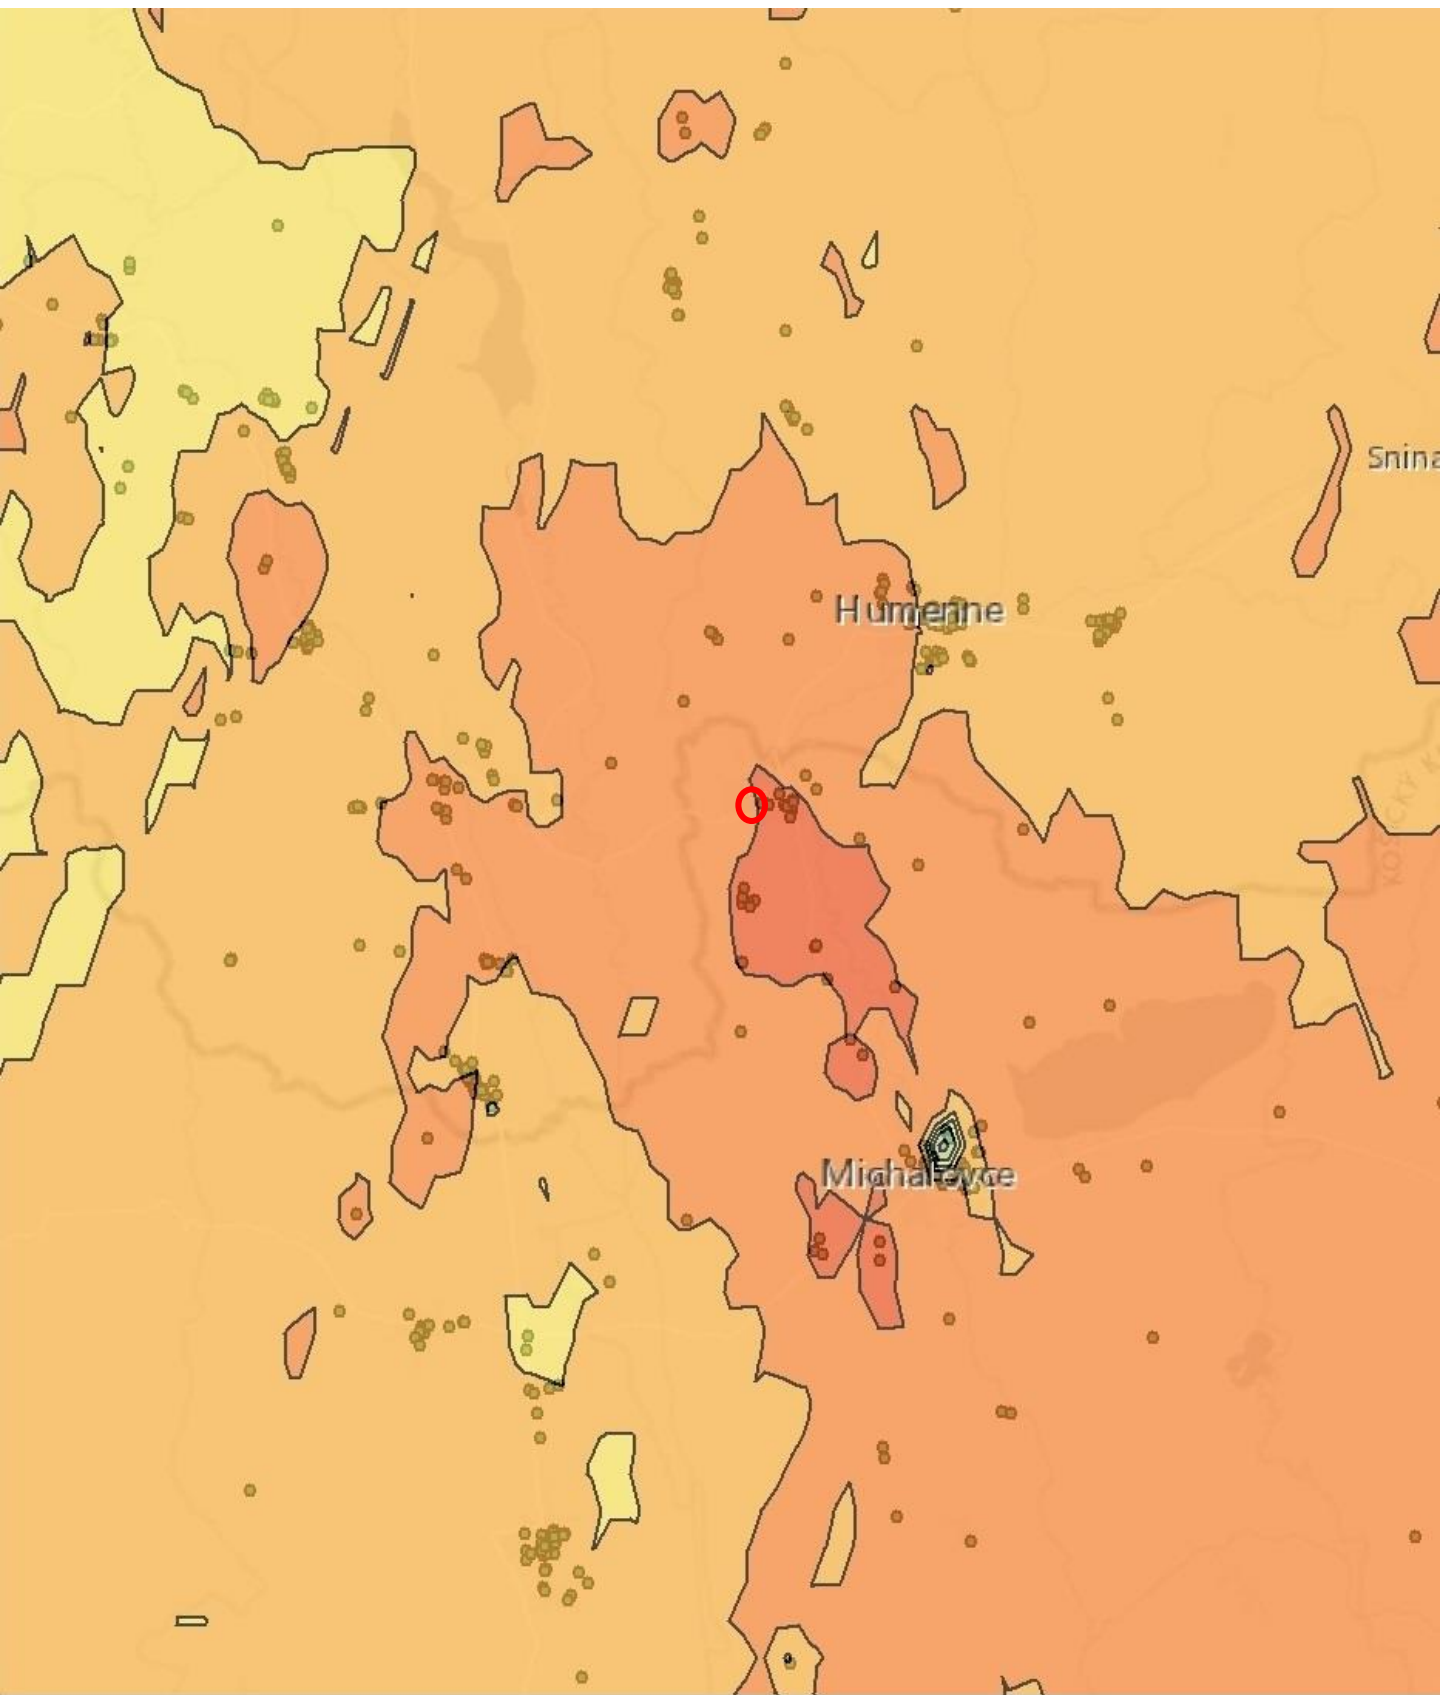

Esri, HERE, DeLorme, MapmyIndia, © OpenStreetMap contributors, and the GIS user community

**PCB 157**

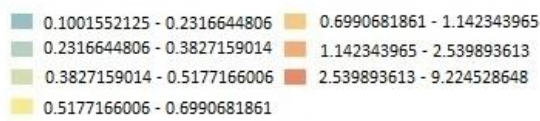

**APPROXIMATE AREA**

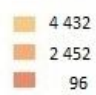

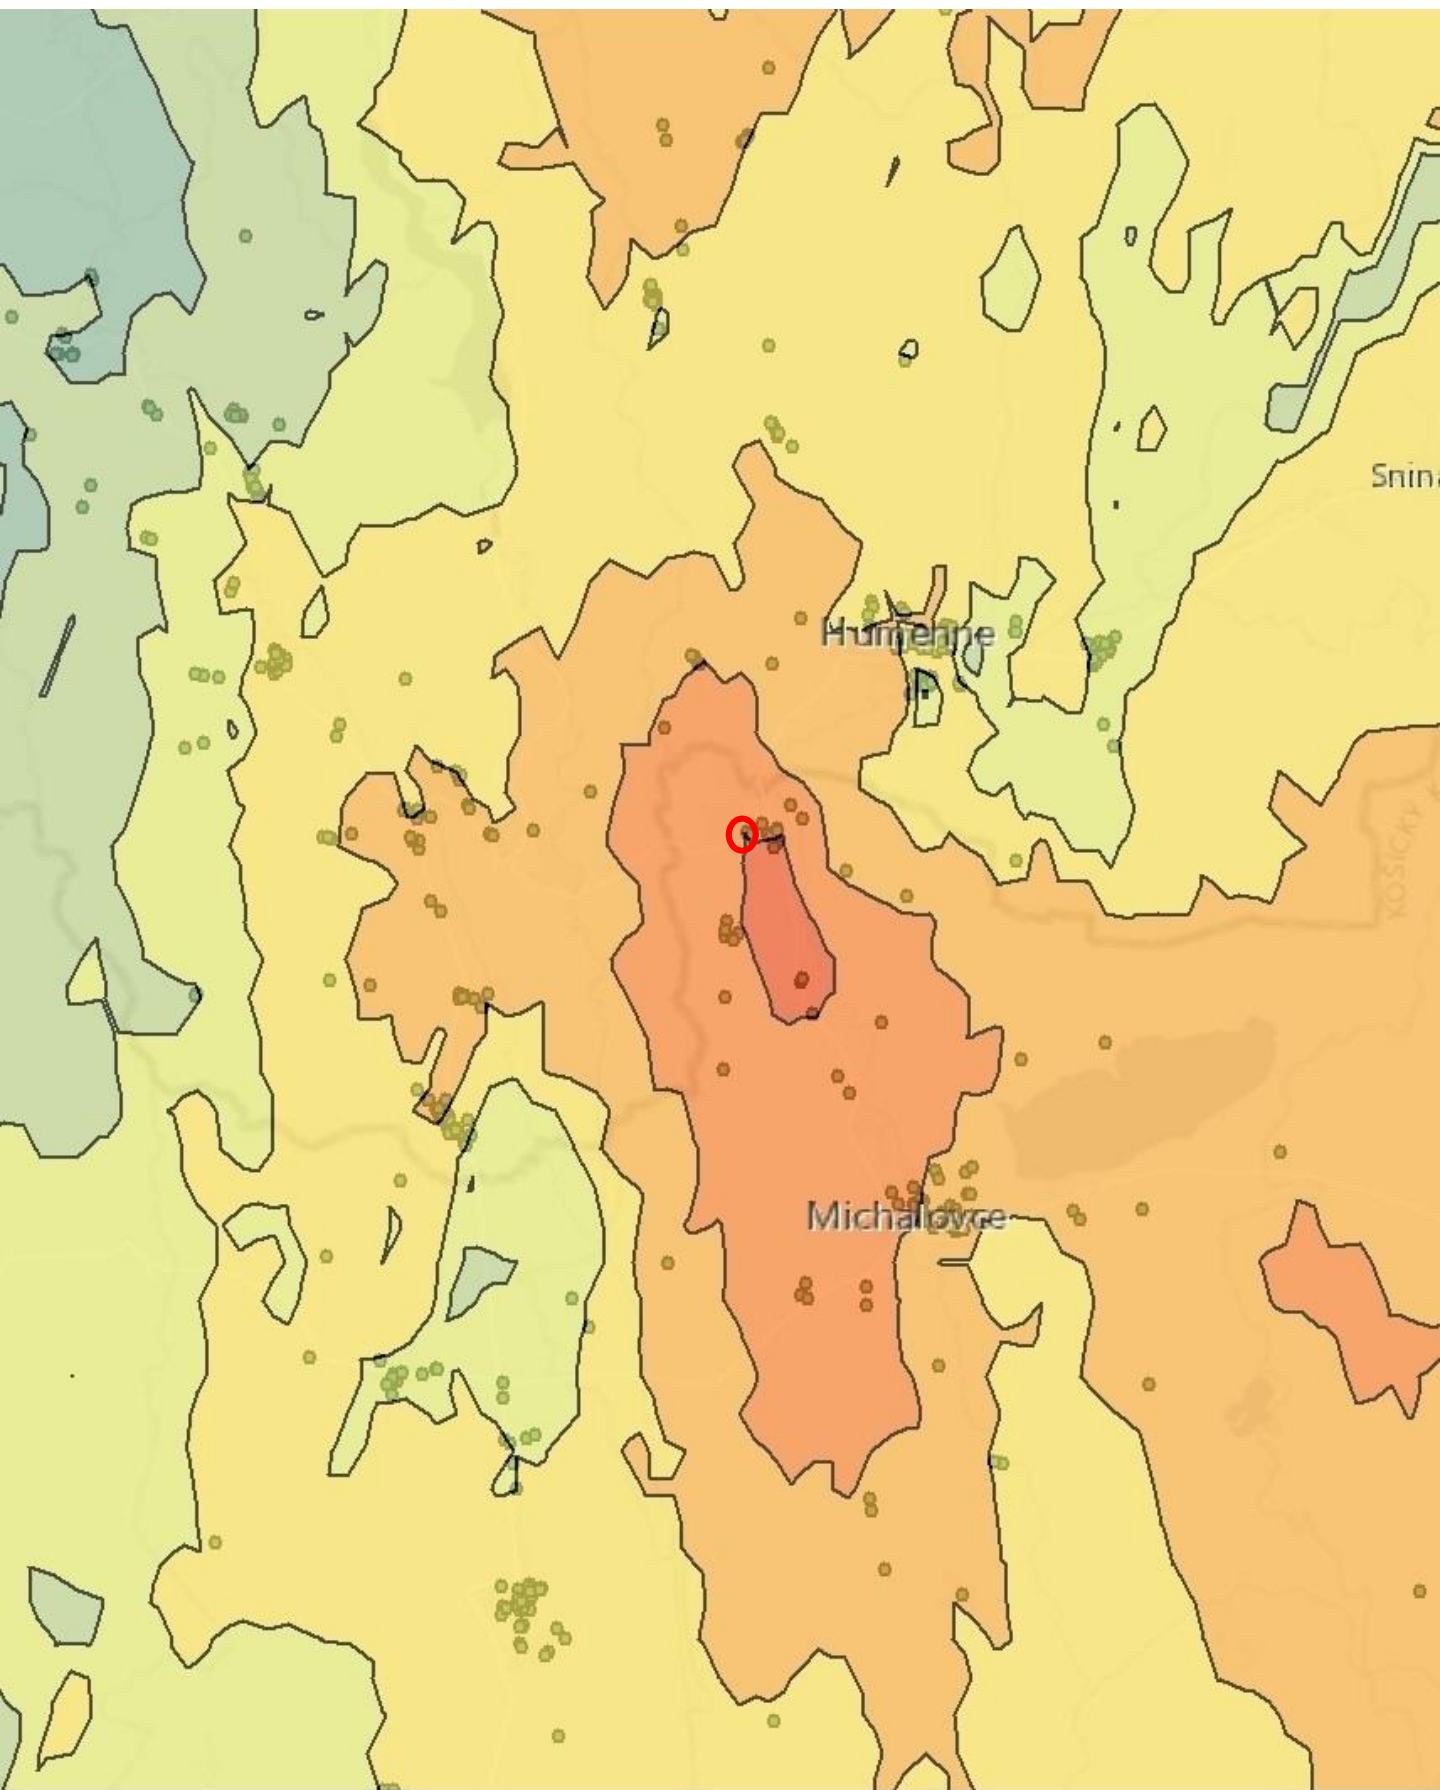

Esri, HERE, DeLorme, MapmyIndia, © OpenStreetMap contributors, and the GIS user community

**PCB 167**

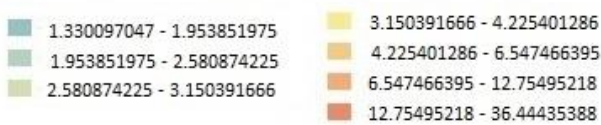

**APPROXIMATE AREA**

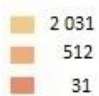

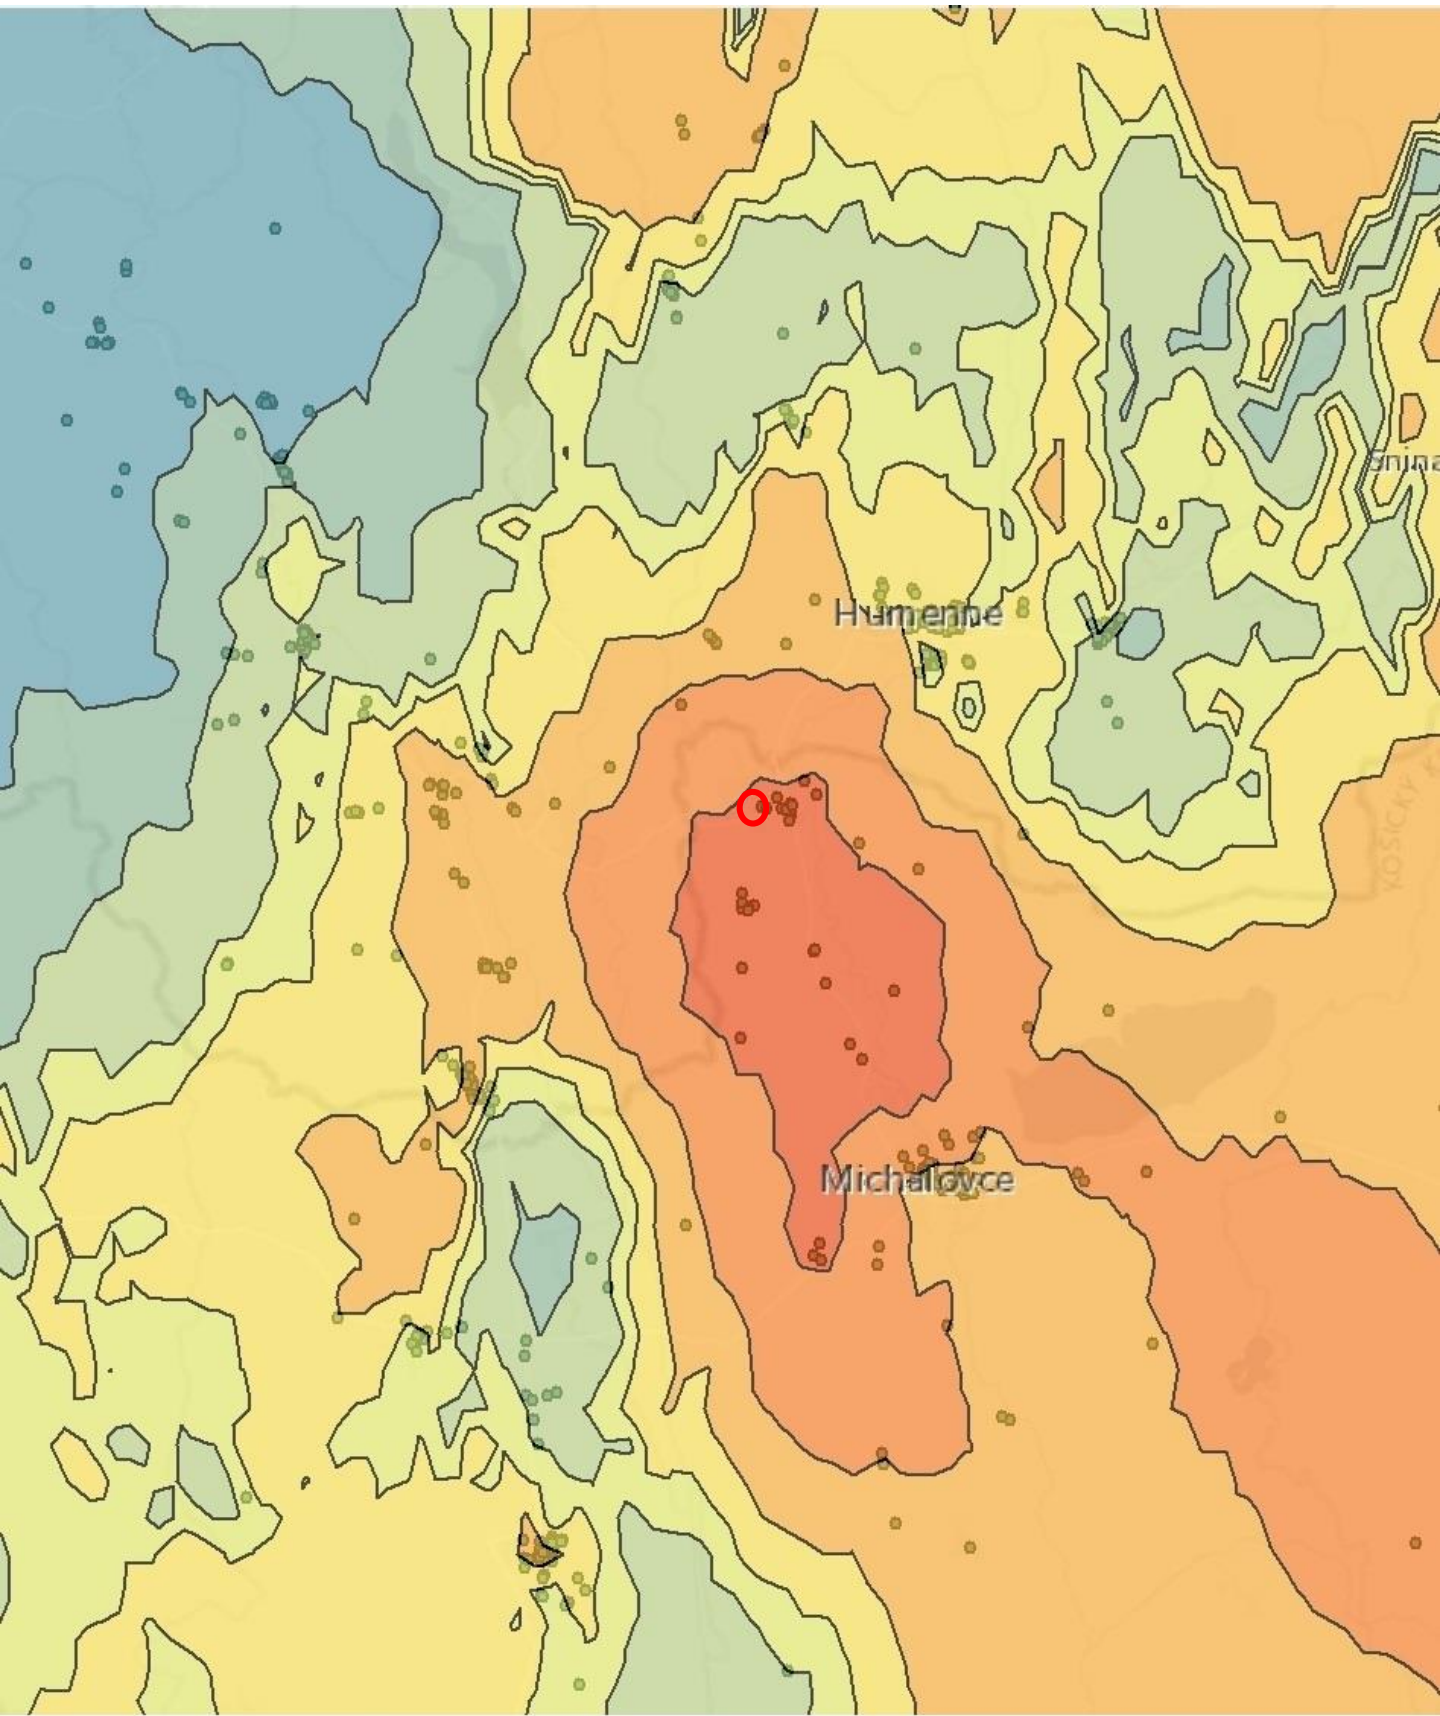

Esri, HERE, DeLorme, MapmyIndia, © OpenStreetMap contributors, and the GIS user community

**PCB 170**

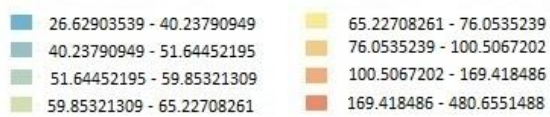

**APPROXIMATE AREA**

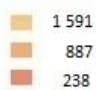

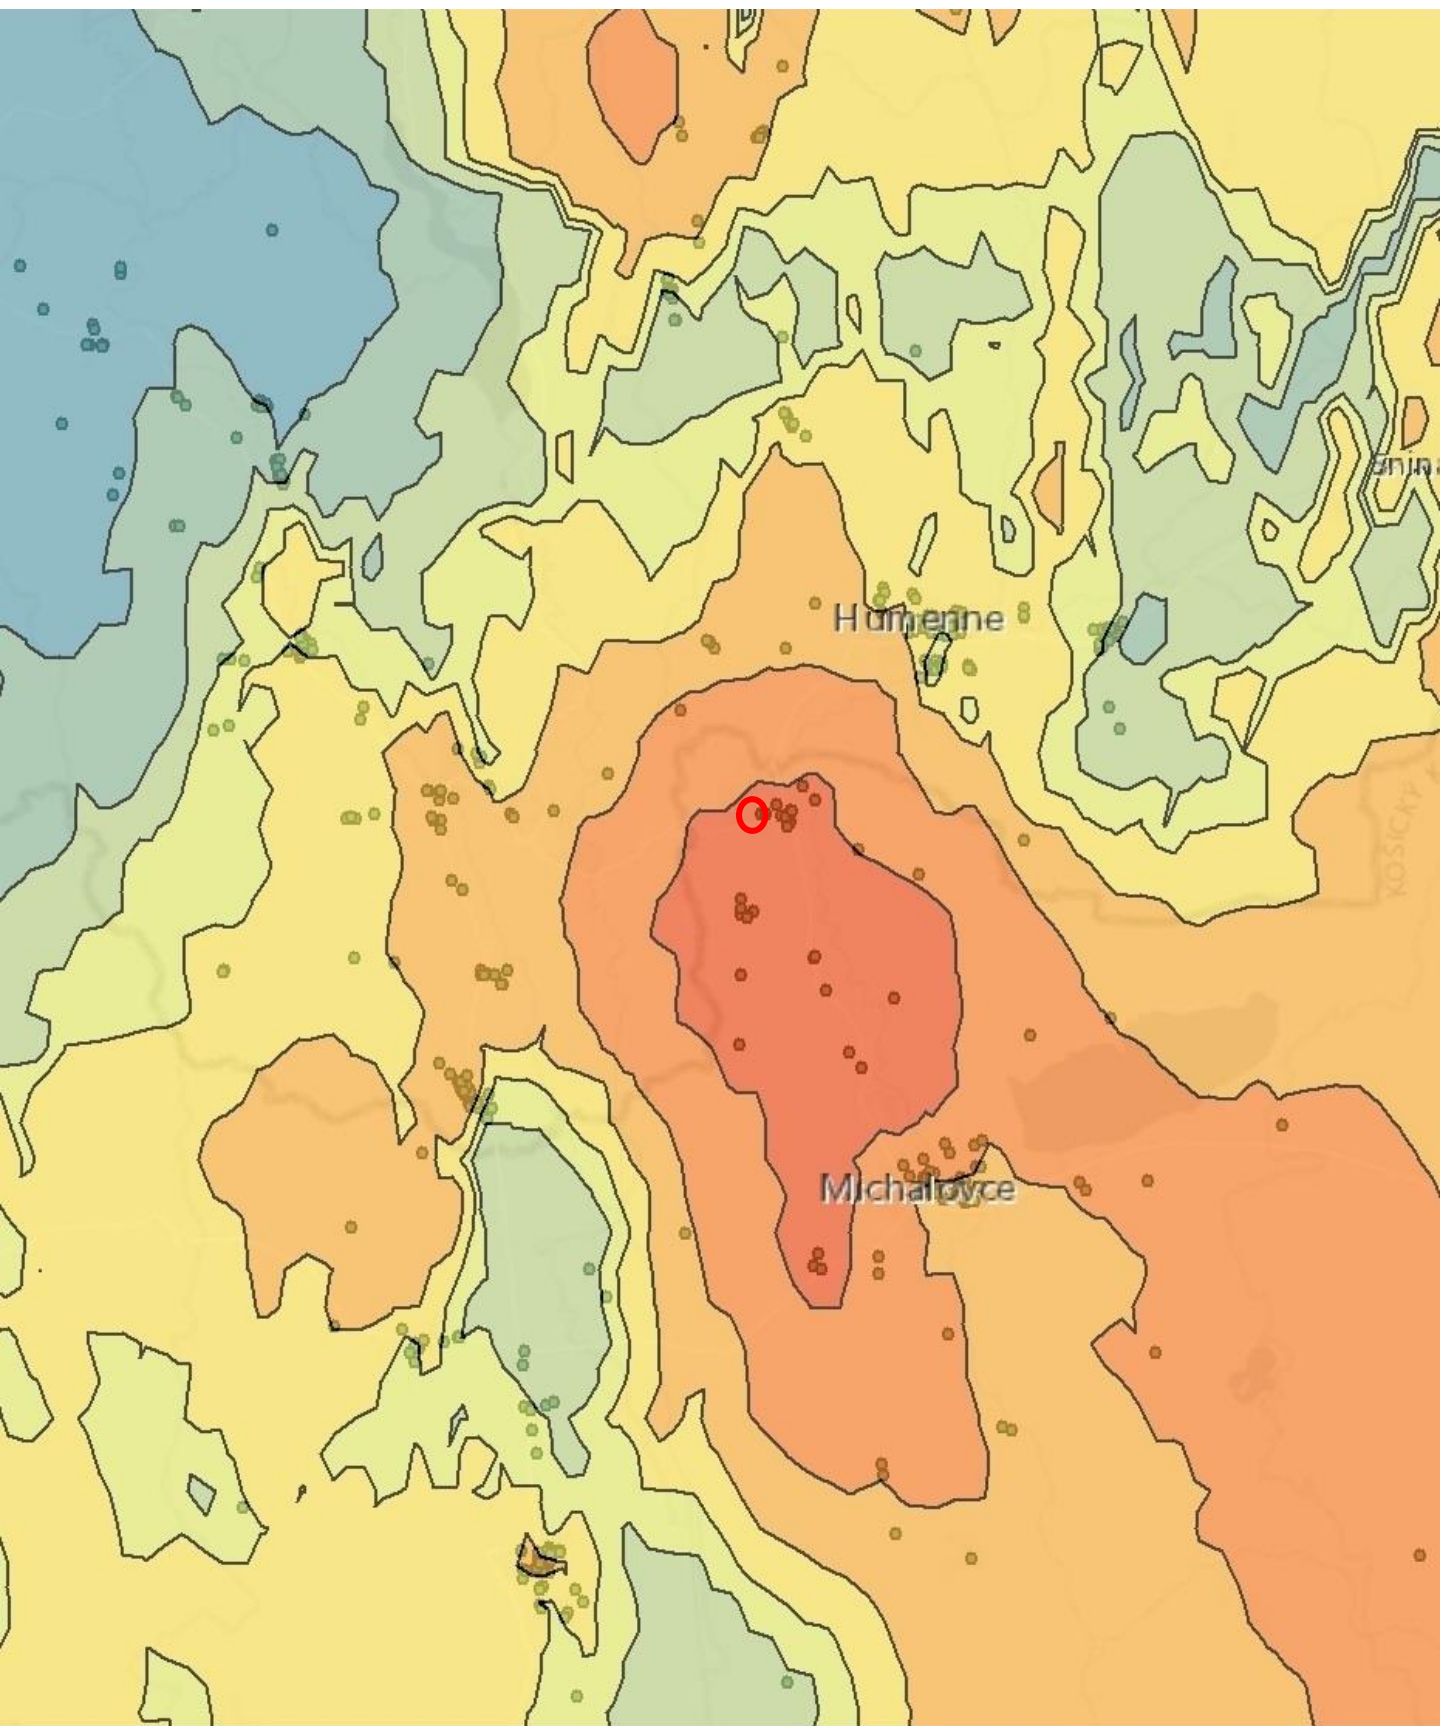

Esri, HERE, DeLorme, MapmyIndia, © OpenStreetMap contributors, and the GIS user community

**PCB 180**

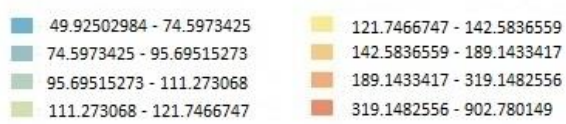

**APPROXIMATE AREA**

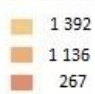



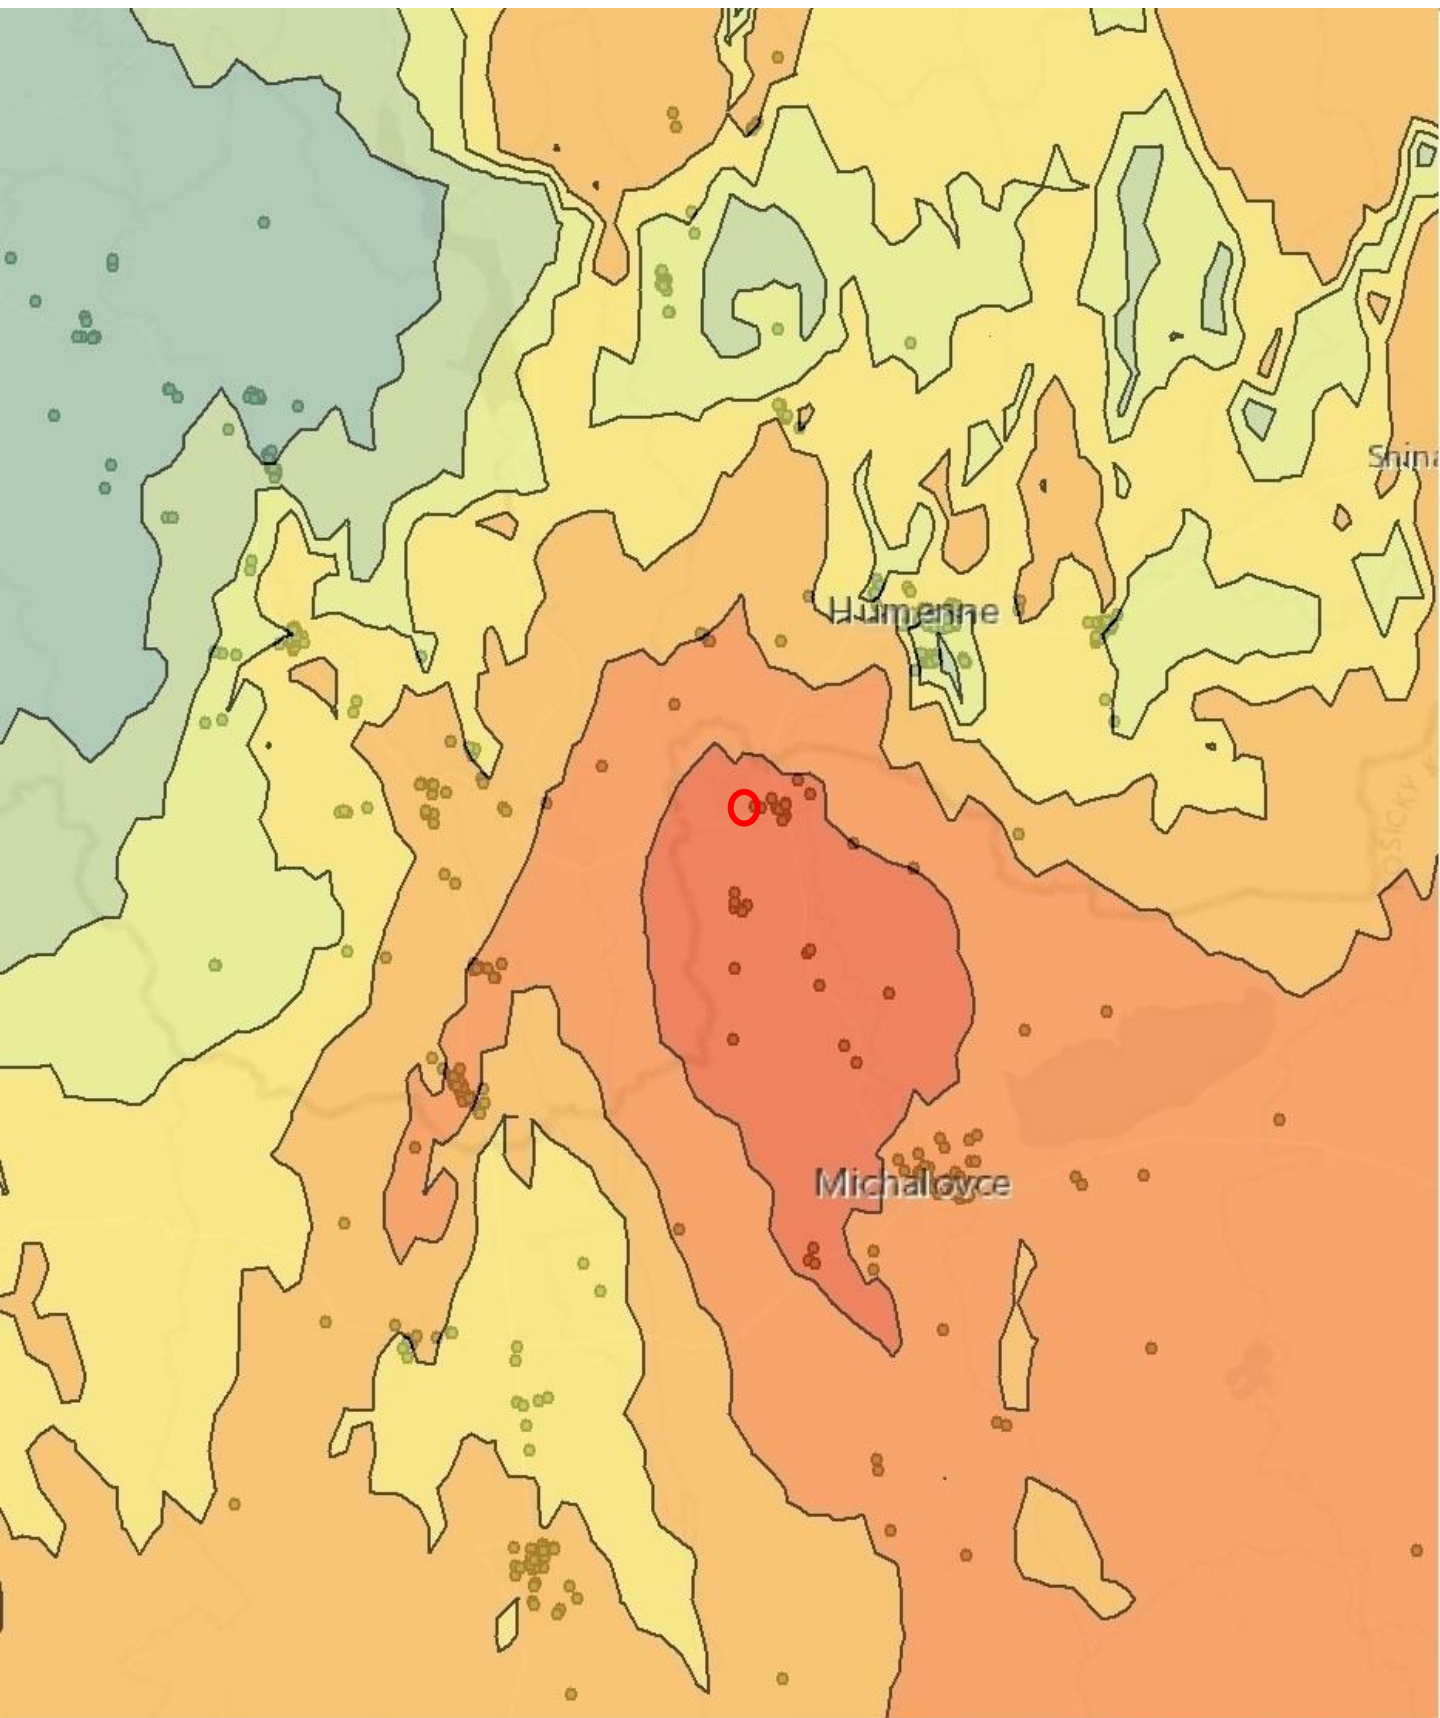

Esri, HERE, DeLorme, MapmyIndia, © OpenStreetMap contributors, and the GIS user community

**PCB 187**

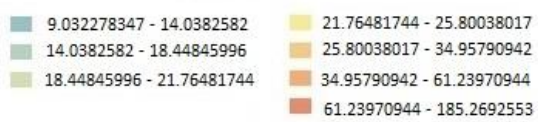

**APPROXIMATE AREA**

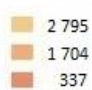

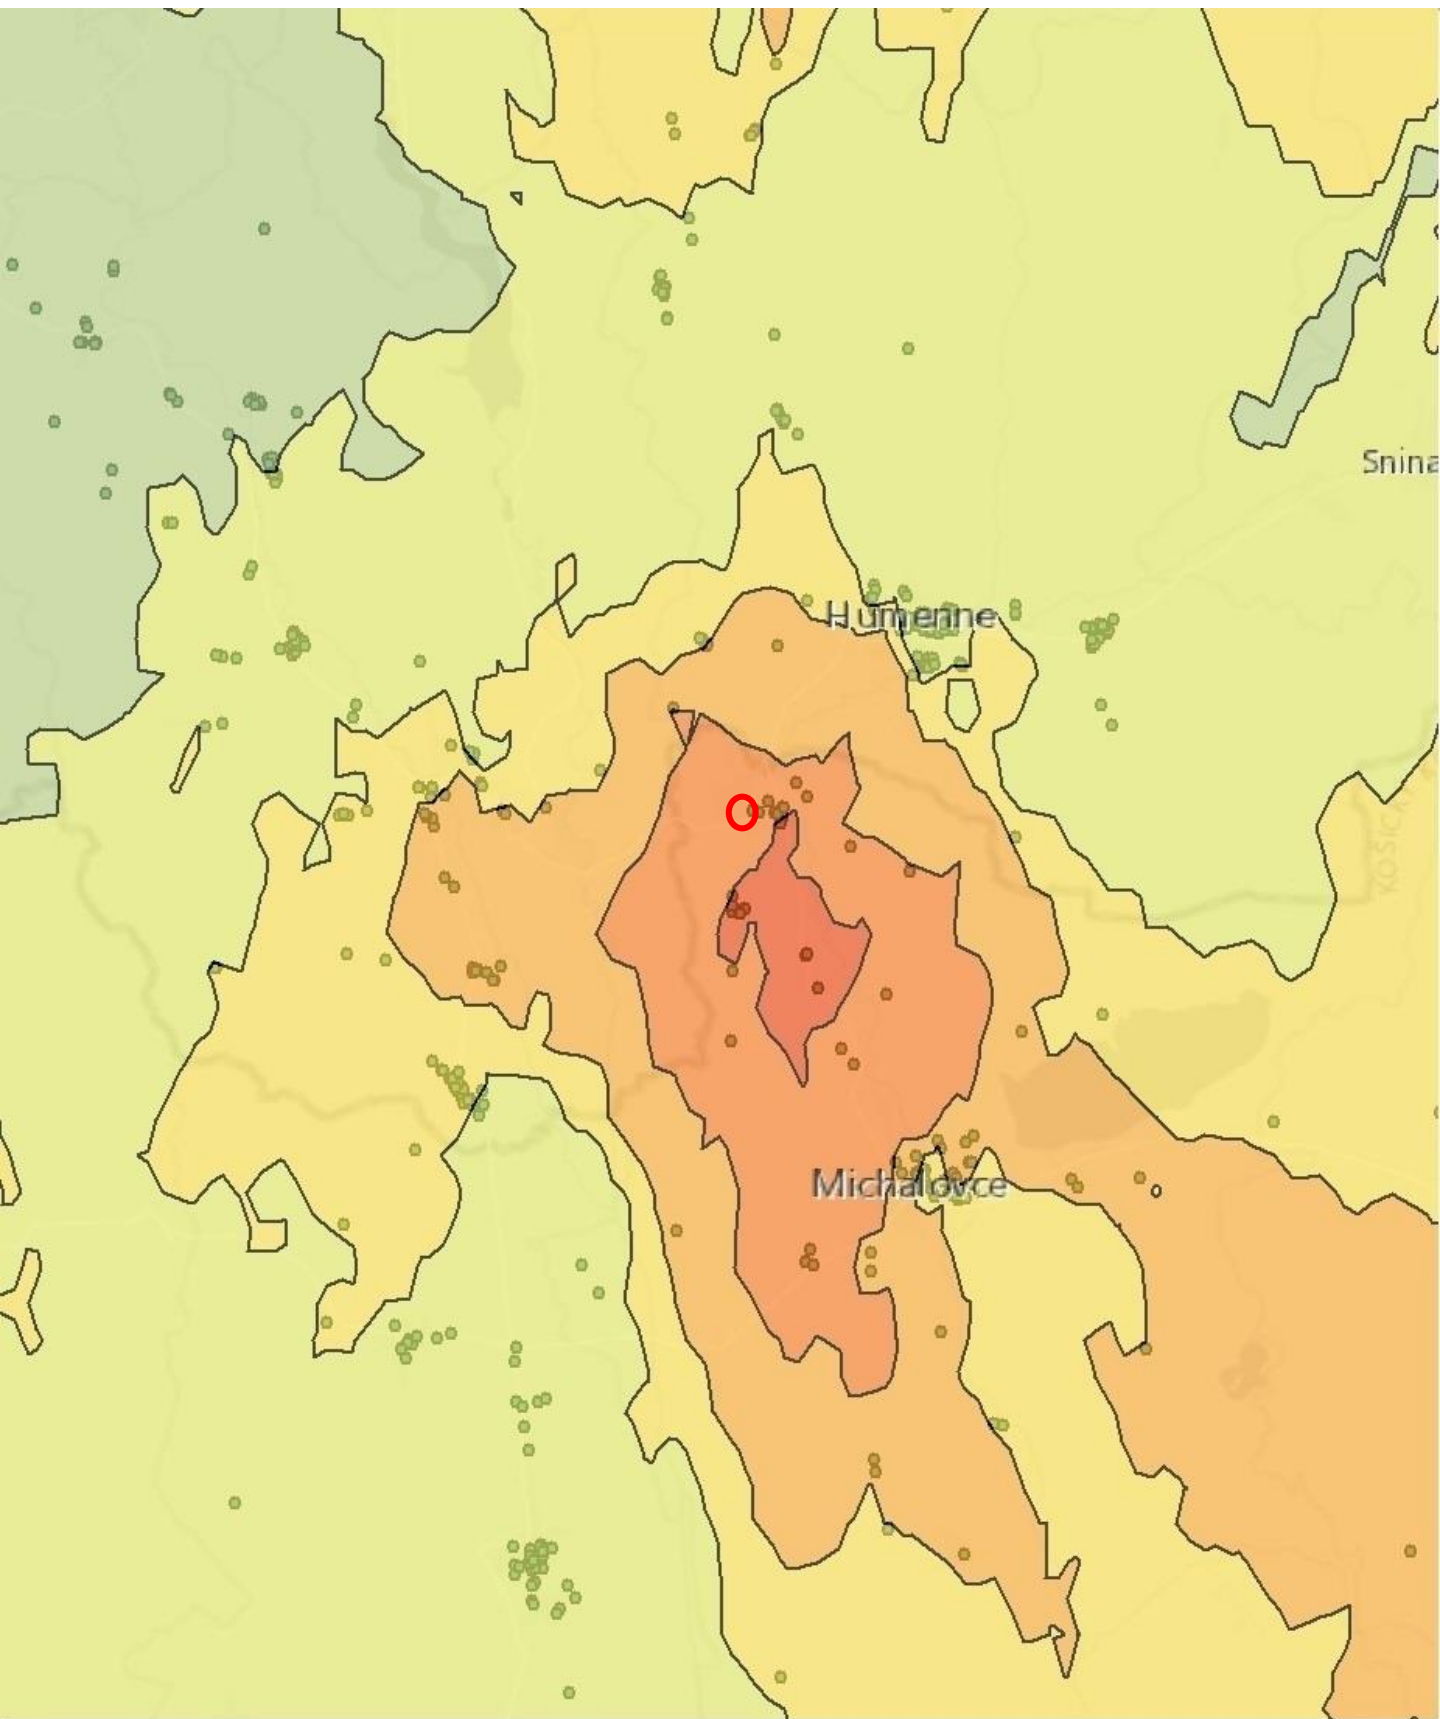

Esri, HERE, DeLorme, MapmyIndia, © OpenStreetMap contributors, and the GIS user community

**PCB 189**

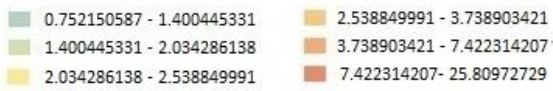

**APPROXIMATE AREA**

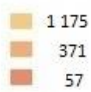

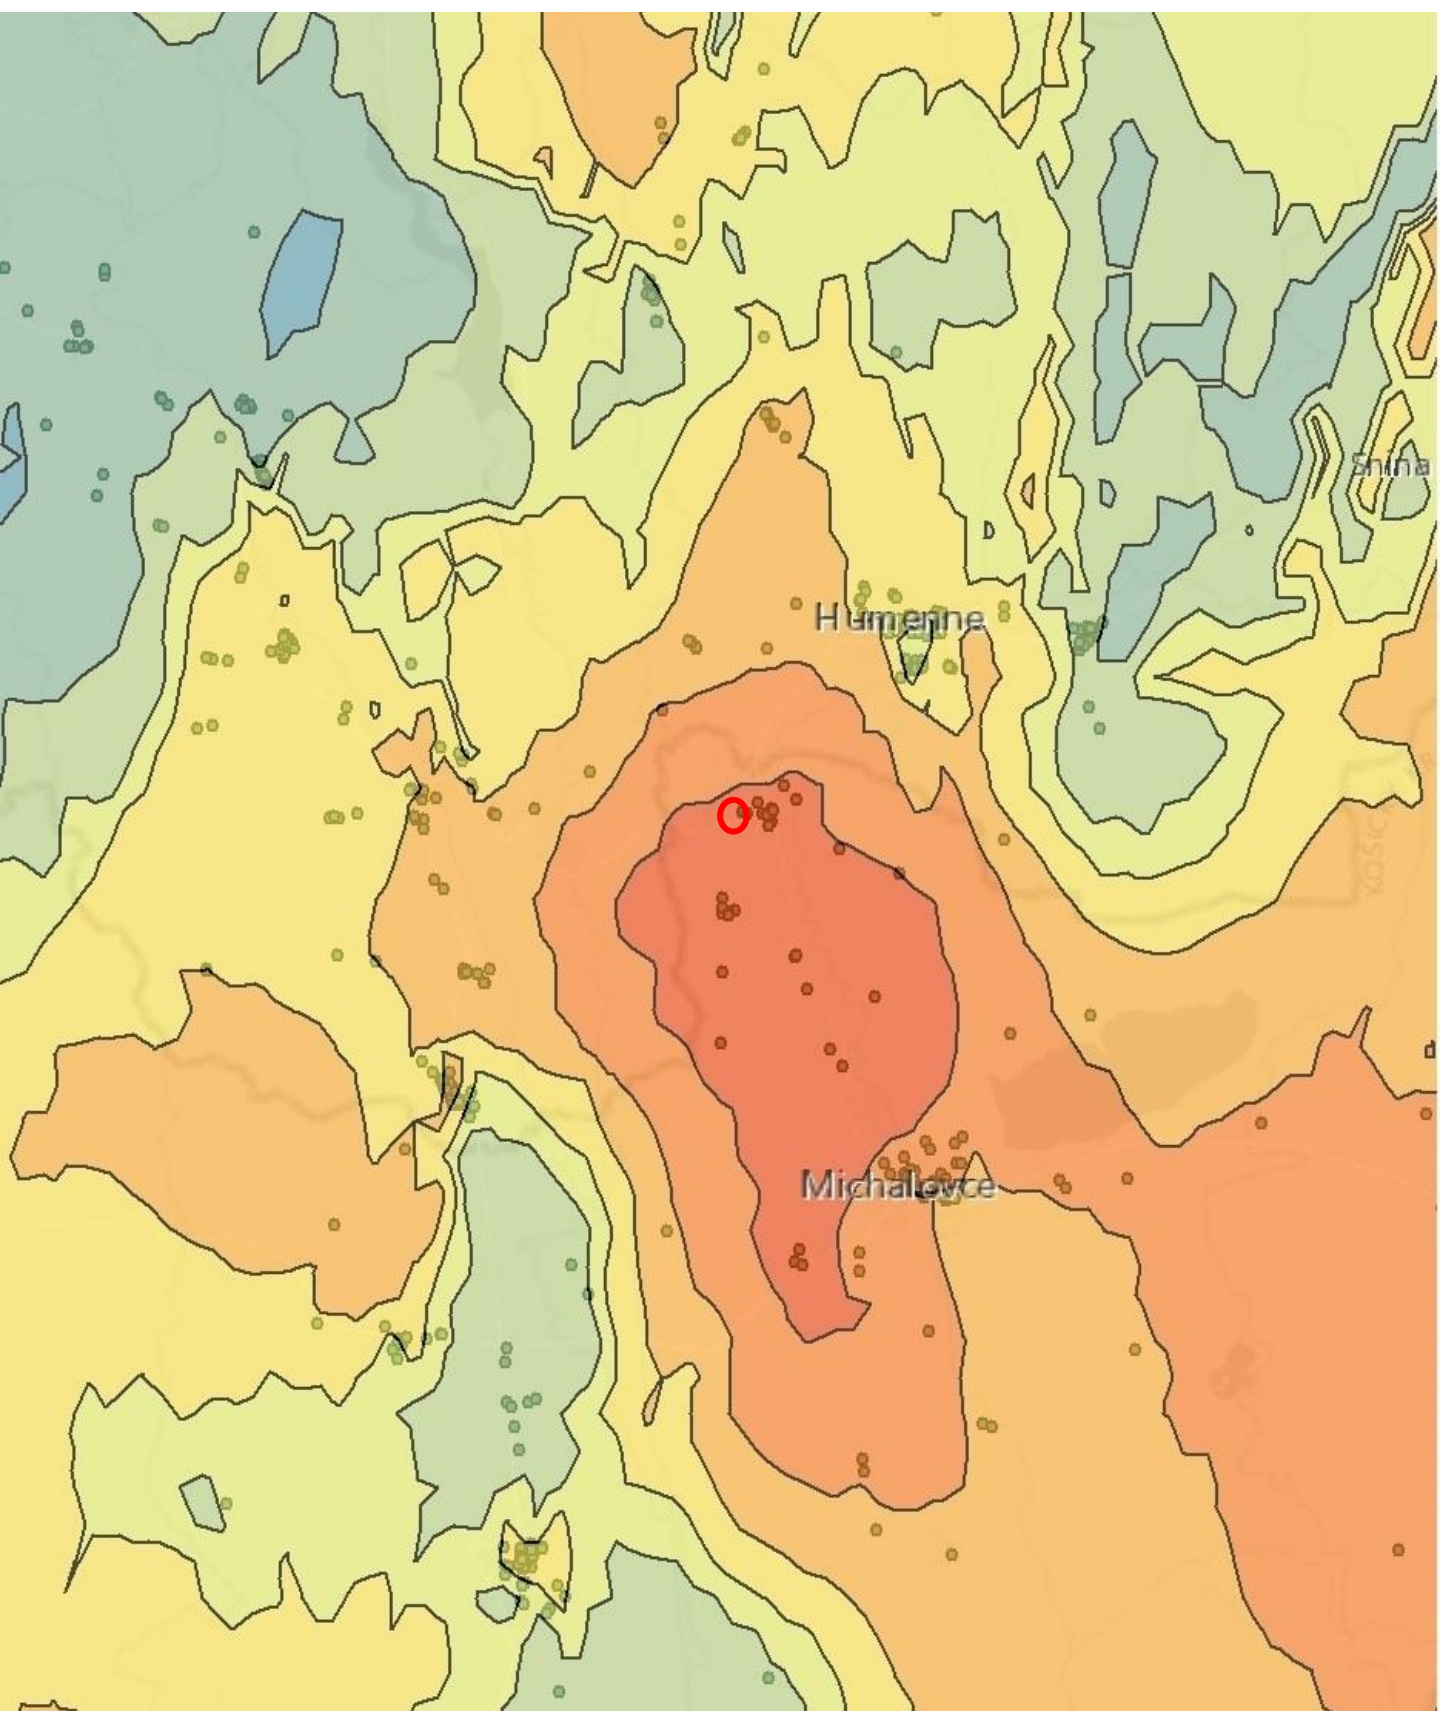

Esri, HERE, DeLorme, MapmyIndia, © OpenStreetMap contributors, and the GIS user community

**PCB 194**

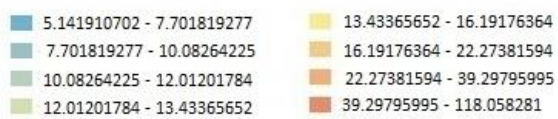

**APPROXIMATE AREA**

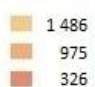

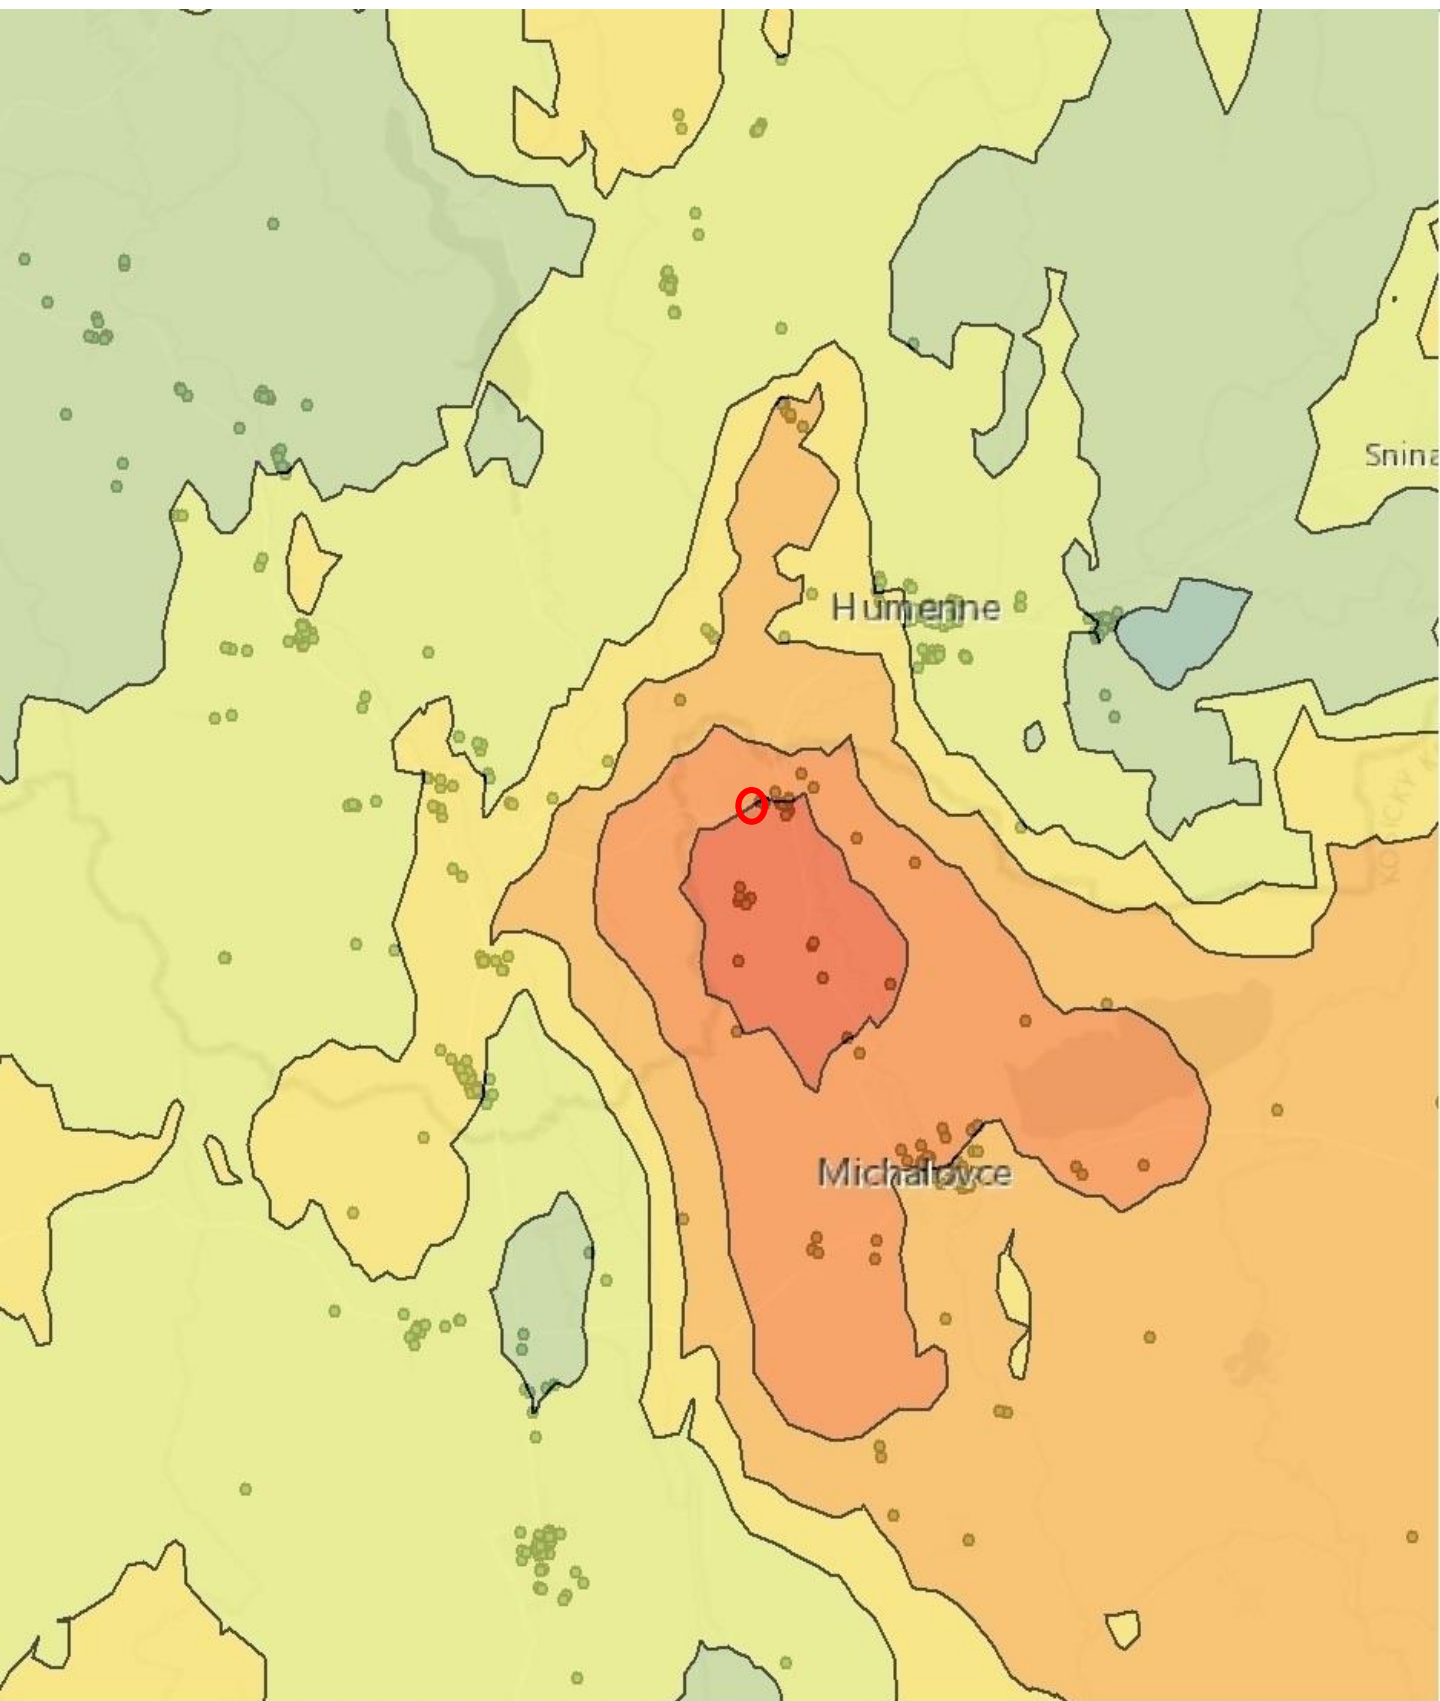

Esri, HERE, DeLorme, MapmyIndia, © OpenStreetMap contributors, and the GIS user community

**PCB 196**

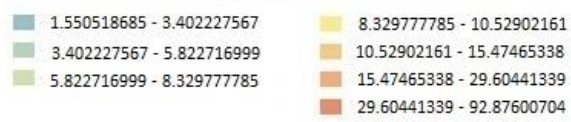

**APPROXIMATE AREA**

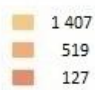

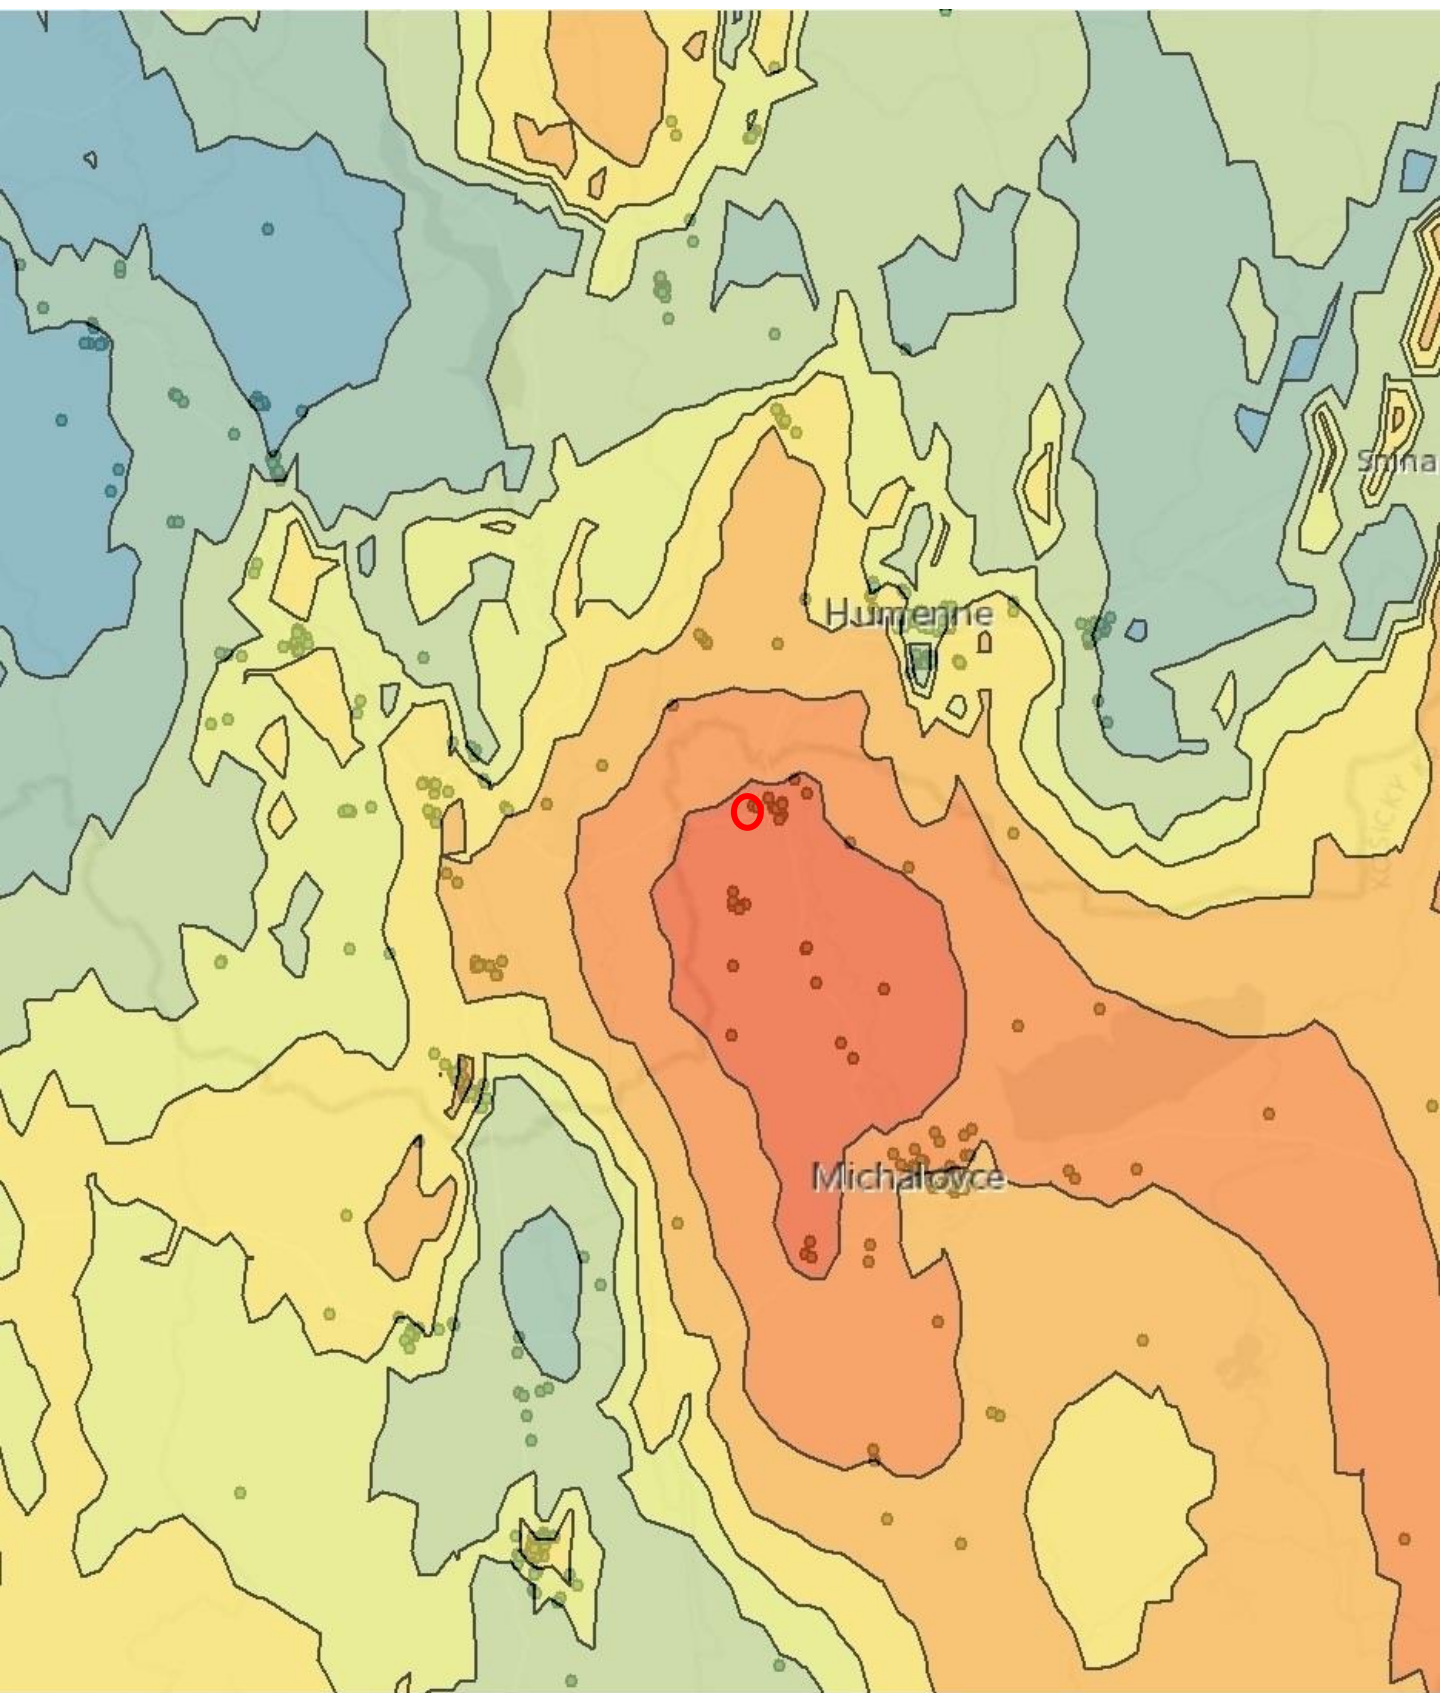

Esri, HERE, DeLorme, MapmyIndia, © OpenStreetMap contributors, and the GIS user community

#### PCB 199

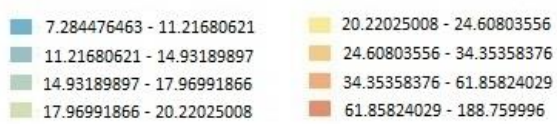

#### APPROXIMATE AREA

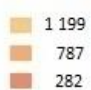

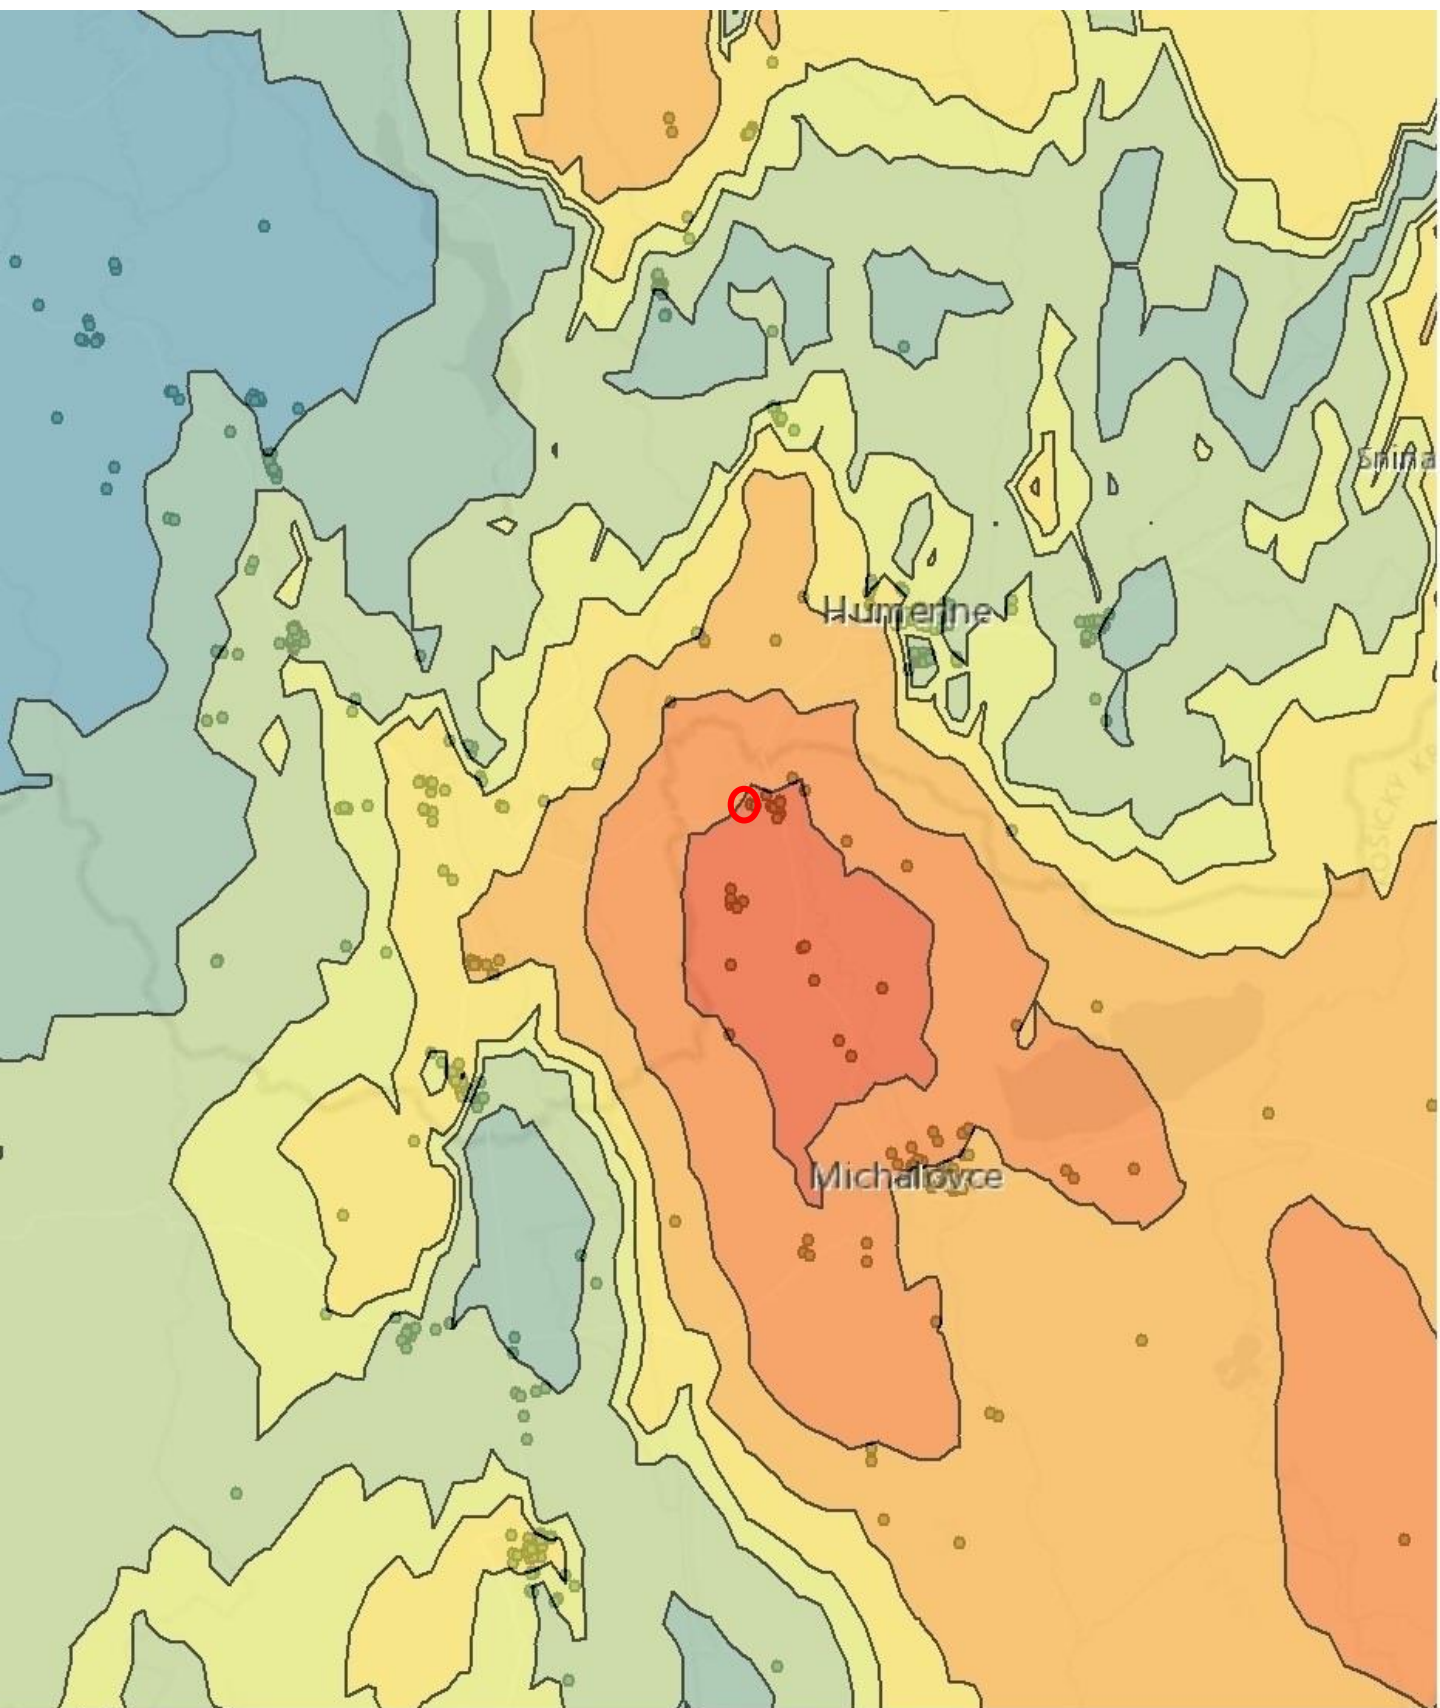

Esri, HERE, DeLorme, MapmyIndia, © OpenStreetMap contributors, and the GIS user community

**sum PCB**

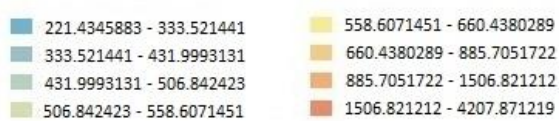

**APPROXIMATE AREA**

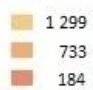

Supplement: NIHMS1509762-supplement-1.pdf [file NIHMS1509762-supplement-1.pdf]
